# Supplementary material for: An alternative method to analyse the biomarker‐strategy design
Source: PubMed Central journal article supplement (PMC6492198; doi:10.1002/sim.7940), 2018-09-09
Supplement: SIM-37-4636-s001.pdf [file SIM-37-4636-s001.pdf]

# **Supplemental Material**

**“An alternative method to analyse the Biomarker-strategy design”**

C. U. Kunz, T. Jaki, and N. Stallard

July 24, 2017

# Contents

|          |                                                            |           |
|----------|------------------------------------------------------------|-----------|
| <b>1</b> | <b>Derivations</b>                                         | <b>3</b>  |
| <b>2</b> | <b>Traditional analysis</b>                                | <b>7</b>  |
| <b>3</b> | <b>Alternative analysis method</b>                         | <b>7</b>  |
| 3.1      | Treatment effect . . . . .                                 | 7         |
| 3.2      | Biomarker and interaction effect . . . . .                 | 8         |
| 3.3      | Covariance structure of the test statistics . . . . .      | 9         |
| <b>4</b> | <b>Sample size calculation</b>                             | <b>12</b> |
| 4.1      | Treatment effect . . . . .                                 | 12        |
| 4.2      | Biomarker and interaction effect . . . . .                 | 12        |
| <b>5</b> | <b>Estimators for the variances of the test statistics</b> | <b>13</b> |
| <b>6</b> | <b>Confidence intervals</b>                                | <b>16</b> |

## 1 Derivations

In this section, we provide general derivations to be used in later sections. Numbers in brackets underneath mathematical expressions refer to the Equation where the part of the expression was derived.

Let  $a$  denote the number of patients who are BM positive and are classified as being positive, let  $b$  denote the number of patients who are BM positive but are classified as negative, let  $c$  denote the number of patients who are BM negative but classified as positive, and let  $d = N - a - b - c$  denote the number of patients who are BM negative and classified as negative. Then, the probability of observing a specific combination of  $a$ ,  $b$ ,  $c$ ,  $d$  is given by:

$$\binom{N}{a} \binom{N-a}{b} \binom{N-a-b}{c} (tp)^a ((1-t)p)^b ((1-s)(1-p))^c (s(1-p))^{N-a-b-c} \quad (1)$$

Now,  $Nr_1$  patients will be randomised into the BM group of which  $a + c$  patients will be classified as BM positive. Hence, we get

$$\begin{aligned} E[n_{T_{\oplus}}] &= \sum_{a=0}^{Nr_1} \sum_{b=0}^{Nr_1-a} \sum_{c=0}^{Nr_1-a-b} \binom{Nr_1}{a} \binom{Nr_1-a}{b} \binom{Nr_1-a-b}{c} \\ &\quad (tp)^a ((1-t)p)^b ((1-s)(1-p))^c (s(1-p))^{N-a-b-c} (a+c) \\ &= Nr_1 (tp + (1-s)(1-p)) = Nr_1 p_{\oplus} \end{aligned} \quad (2)$$

$$\text{VAR}[n_{T_{\oplus}}] = Nr_1 (tp + (1-s)(1-p)) (1 - (tp + (1-s)(1-p))) = Nr_1 p_{\oplus} p_{\ominus} \quad (3)$$

$$\begin{aligned} E[n_{C_{\ominus}}] &= \sum_{a=0}^{Nr_1} \sum_{b=0}^{Nr_1-a} \sum_{c=0}^{Nr_1-a-b} \binom{Nr_1}{a} \binom{Nr_1-a}{b} \binom{Nr_1-a-b}{c} \\ &\quad (tp)^a ((1-t)p)^b ((1-s)(1-p))^c (s(1-p))^{N-a-b-c} (b+d) \\ &= Nr_1 ((1-t)p + s(1-p)) \end{aligned} \quad (4)$$

$$\text{VAR}[n_{C_{\ominus}}] = Nr_1 ((1-t)p + s(1-p)) (1 - ((1-t)p + s(1-p))) = Nr_1 p_{\oplus} p_{\ominus} \quad (5)$$

$$\text{COV}[n_{T_{\oplus}}, n_{C_{\ominus}}] = Nr_1 ((1-t)p + s(1-p)) (1 - ((1-t)p + s(1-p))) = -Nr_1 p_{\oplus} p_{\ominus} \quad (6)$$

For the sums, we get:

$$\begin{aligned} E \left[ \sum_{i=1}^{n_{T_{\oplus}}} y_{T_{\oplus},i} \right] &= \sum_{a=0}^{Nr_1} \sum_{b=0}^{Nr_1-a} \sum_{c=0}^{Nr_1-a-b} \binom{Nr_1}{a} \binom{Nr_1-a}{b} \binom{Nr_1-a-b}{c} \\ &\quad (tp)^a ((1-t)p)^b ((1-s)(1-p))^c (s(1-p))^{N-a-b-c} (a\mu_{T_+} + c\mu_{T_-}) \\ &= Nr_1 (tp\mu_{T_+} + (1-s)(1-p)\mu_{T_-}) \end{aligned} \quad (7)$$

$$\text{VAR} \left[ \sum_{i=1}^{n_{T_{\oplus}}} y_{T_{\oplus},i} \right] = Nr_1 \left( pt(\mu_{T_+}^2 + \sigma_{T_+}^2) + (1-p)(1-s)(\mu_{T_-}^2 + \sigma_{T_-}^2) - (pt\mu_{T_+} + (1-p)(1-s)\mu_{T_-})^2 \right) \quad (8)$$

$$\begin{aligned} E \left[ \sum_{i=1}^{n_{T_{\oplus}}} y_{T_{\oplus},i}^2 \right] &= E \left[ \sum_{i=1}^{n_{T_{\oplus}}} E \left[ y_{T_{\oplus},i}^2 \right] \right] = E \left[ \sum_{i=1}^{n_{T_{\oplus}}} \left( \text{VAR} [y_{T_{\oplus},i}] + E [y_{T_{\oplus},i}]^2 \right) \right] \\ &= E \left[ \sum_{i=1}^{n_{T_{\oplus}}} \frac{pt}{p_{\oplus}} \left( \mu_{T_+}^2 + \sigma_{T_+}^2 \right) + \frac{(1-p)(1-s)}{p_{\oplus}} \left( \mu_{T_-}^2 + \sigma_{T_-}^2 \right) - \left( \frac{pt}{p_{\oplus}} \mu_{T_+} + \frac{(1-p)(1-s)}{p_{\oplus}} \mu_{T_-} \right)^2 \right. \\ &\quad \left. + \left( \frac{pt}{p_{\oplus}} \mu_{T_+} + \frac{(1-p)(1-s)}{p_{\oplus}} \mu_{T_-} \right)^2 \right] \\ &= E \left[ \sum_{i=1}^{n_{T_{\oplus}}} \frac{1}{p_{\oplus}} \left( pt \left( \mu_{T_+}^2 + \sigma_{T_+}^2 \right) + (1-p)(1-s) \left( \mu_{T_-}^2 + \sigma_{T_-}^2 \right) \right) \right] \\ &= Nr_1 \left( pt \left( \mu_{T_+}^2 + \sigma_{T_+}^2 \right) + (1-p)(1-s) \left( \mu_{T_-}^2 + \sigma_{T_-}^2 \right) \right) \end{aligned} \quad (9)$$

$$\begin{aligned} \mathbb{E} \left[ \sum_{i=1}^{n_{C\ominus}} y_{C\ominus,i} \right] &= \sum_{a=0}^{Nr_1} \sum_{b=0}^{Nr_1-a} \sum_{c=0}^{Nr_1-a-b} \binom{Nr_1}{a} \binom{Nr_1-a}{b} \binom{Nr_1-a-b}{c} \\ &\quad (tp)^a ((1-t)p)^b ((1-s)(1-p))^c (s(1-p))^{N-a-b-c} (b\mu_{C_+} + d\mu_{C_-}) \\ &= Nr_1 ((1-t)p\mu_{C_+} + s(1-p)\mu_{C_-}) \end{aligned} \quad (10)$$

$$\text{VAR} \left[ \sum_{i=1}^{n_{C\ominus}} y_{C\ominus,i} \right] = Nr_1 \left( p(1-t)(\mu_{C_+}^2 + \sigma_{C_+}^2) + (1-p)s(\mu_{C_-}^2 + \sigma_{C_-}^2) - (p(1-t)\mu_{C_+} + (1-p)s\mu_{C_-})^2 \right) \quad (11)$$

$$\begin{aligned} \mathbb{E} \left[ \sum_{i=1}^{n_{C\ominus}} y_{C\ominus,i}^2 \right] &= \mathbb{E} \left[ \sum_{i=1}^{n_{C\ominus}} \mathbb{E} [y_{C\ominus,i}^2] \right] = \mathbb{E} \left[ \sum_{i=1}^{n_{C\ominus}} \left( \text{VAR} [y_{C\ominus,i}] + \mathbb{E} [y_{C\ominus,i}]^2 \right) \right] \\ &= \mathbb{E} \left[ \sum_{i=1}^{n_{C\ominus}} \frac{p(1-t)}{p_\ominus} (\mu_{C_+}^2 + \sigma_{C_+}^2) + \frac{(1-p)s}{p_\ominus} (\mu_{C_-}^2 + \sigma_{C_-}^2) - \left( \frac{p(1-t)}{p_\ominus} \mu_{C_+} + \frac{(1-p)s}{p_\ominus} \mu_{C_-} \right)^2 \right. \\ &\quad \left. + \left( \frac{p(1-t)}{p_\ominus} \mu_{C_+} + \frac{(1-p)s}{p_\ominus} \mu_{C_-} \right)^2 \right] \\ &= \mathbb{E} \left[ \sum_{i=1}^{n_{C\ominus}} \frac{1}{p_\ominus} \left( p(1-t) (\mu_{C_+}^2 + \sigma_{C_+}^2) + (1-p)s (\mu_{C_-}^2 + \sigma_{C_-}^2) \right) \right] \\ &= Nr_1 \left( p(1-t) (\mu_{C_+}^2 + \sigma_{C_+}^2) + (1-p)s (\mu_{C_-}^2 + \sigma_{C_-}^2) \right) \end{aligned} \quad (12)$$

$$\mathbb{E} \left[ \frac{1}{n_T} \sum_{i=1}^{n_T} y_{T,i} \right] = p\mu_{T_+} + (1-p)\mu_{T_-} = \mu_T \quad (13)$$

$$\text{VAR} \left[ \frac{1}{n_T} \sum_{i=1}^{n_T} y_{T,i} \right] = \frac{p(\mu_{T_+}^2 + \sigma_{T_+}^2) + (1-p)(\mu_{T_-}^2 + \sigma_{T_-}^2) - (p\mu_{T_+} + (1-p)\mu_{T_-})^2}{N(1-r_1)r_2} = \frac{\sigma_T^2}{N(1-r_1)r_2} \quad (14)$$

$$\mathbb{E} \left[ \frac{1}{n_C} \sum_{i=1}^{n_C} y_{C,i} \right] = p\mu_{C_+} + (1-p)\mu_{C_-} = \mu_C \quad (15)$$

$$\text{VAR} \left[ \frac{1}{n_C} \sum_{i=1}^{n_C} y_{C,i} \right] = \frac{p(\mu_{C_+}^2 + \sigma_{C_+}^2) + (1-p)(\mu_{C_-}^2 + \sigma_{C_-}^2) - (p\mu_{C_+} + (1-p)\mu_{C_-})^2}{N(1-r_1)(1-r_2)} = \frac{\sigma_C^2}{N(1-r_1)(1-r_2)} \quad (16)$$

$$\begin{aligned} \mathbb{E} \left[ \frac{n_{T\oplus}}{n_T} \sum_{i=1}^{n_T} y_{T,i} \right] &= \underbrace{\mathbb{E} [n_{T\oplus}]}_{(2)} \underbrace{\mathbb{E} \left[ \frac{1}{n_T} \sum_{i=1}^{n_T} y_{T,i} \right]}_{(13)} + \underbrace{\text{COV} \left[ n_{T\oplus}, \frac{1}{n_T} \sum_{i=1}^{n_T} y_{T,i} \right]}_{=0} \\ &= Nr_1 (tp + (1-p)(1-s)) \mu_T = Nr_1 p_\oplus \mu_T \end{aligned} \quad (17)$$

$$\begin{aligned} \text{VAR} \left[ \frac{n_{T\oplus}}{n_T} \sum_{i=1}^{n_T} y_{T,i} \right] &= \mathbb{E} \left[ n_{T\oplus}^2 \right] \mathbb{E} \left[ \left( \frac{1}{n_T} \sum_{i=1}^{n_T} y_{T,i} \right)^2 \right] - (\mathbb{E} [n_{T\oplus}])^2 \left( \mathbb{E} \left[ \frac{1}{n_T} \sum_{i=1}^{n_T} y_{T,i} \right] \right)^2 \\ &= \left( \underbrace{\mathbb{E} [n_{T\oplus}]^2}_{(2)} + \underbrace{\text{VAR} [n_{T\oplus}]}_{(3)} \right) \left( \underbrace{\mathbb{E} \left[ \frac{1}{n_T} \sum_{i=1}^{n_T} y_{T,i} \right]^2}_{(13)} + \underbrace{\text{VAR} \left[ \frac{1}{n_T} \sum_{i=1}^{n_T} y_{T,i} \right]}_{(14)} \right) \\ &\quad - \underbrace{\mathbb{E} [n_{T\oplus}]^2}_{(2)} \underbrace{\left( \mathbb{E} \left[ \frac{1}{n_T} \sum_{i=1}^{n_T} y_{T,i} \right] \right)^2}_{(13)} \\ &= Nr_1 p_\oplus (1-p_\oplus) \mu_T^2 + ((Nr_1 p_\oplus)^2 + Nr_1 p_\oplus (1-p_\oplus)) \frac{\sigma_T^2}{N(1-r_1)r_2} \end{aligned} \quad (18)$$

$$\mathbb{E} \left[ n_{C_\ominus} \frac{1}{n_C} \sum_{i=1}^{n_C} y_{C,i} \right] = Nr_1 p_\ominus \mu_C \quad (19)$$

$$\text{VAR} \left[ n_{C_\ominus} \frac{1}{n_C} \sum_{i=1}^{n_C} y_{C,i} \right] = Nr_1 p_\ominus (1 - p_\ominus) \mu_C^2 + ((Nr_1 p_\ominus)^2 + Nr_1 p_\ominus (1 - p_\ominus)) \frac{\sigma_C^2}{N(1 - r_1)(1 - r_2)} \quad (20)$$

$$\begin{aligned} \mathbb{E} \left[ \left( \sum_{i=1}^{n_{T_\oplus}} y_{T_\oplus,i} \right) n_{T_\oplus} \right] &= \sum_{a=0}^{Nr_1} \sum_{b=0}^{Nr_1-a} \sum_{c=0}^{Nr_1-a-b} \binom{Nr_1}{a} \binom{Nr_1-a}{b} \binom{Nr_1-a-b}{c} \\ &\quad (tp)^a ((1-t)p)^b ((1-s)(1-p))^c (s(1-p))^{N-a-b-c} \\ &\quad (a\mu_{T_+} + c\mu_{T_-})(a+c) \\ &= Nr_1(1 + Nr_1 p_\oplus - p_\oplus)(tp\mu_{T_+} + (1-p)(1-s)\mu_{T_-}) \end{aligned} \quad (21)$$

$$\mathbb{E} \left[ \left( \sum_{i=1}^{n_{C_\ominus}} y_{C_\ominus,i} \right) n_{C_\ominus} \right] = Nr_1(1 + Nr_1 p_\ominus - p_\ominus)((1-t)p\mu_{C_+} + (1-p)s\mu_{C_-}) \quad (22)$$

$$\mathbb{E} \left[ \left( \sum_{i=1}^{n_{T_\oplus}} y_{T_\oplus,i} \right) n_{C_\ominus} \right] = Nr_1(Nr_1 - 1)p_\ominus(tp\mu_{T_+} + (1-p)(1-s)\mu_{T_-}) \quad (23)$$

$$\mathbb{E} \left[ \left( \sum_{i=1}^{n_{C_\ominus}} y_{C_\ominus,i} \right) n_{T_\oplus} \right] = Nr_1(Nr_1 - 1)p_\oplus((1-t)p\mu_{C_+} + (1-p)s\mu_{C_-}) \quad (24)$$

$$\begin{aligned} \mathbb{E} \left[ \left( \sum_{i=1}^{n_{T_\oplus}} y_{T_\oplus,i} \right) \left( \sum_{i=1}^{n_{C_\ominus}} y_{C_\ominus,i} \right) \right] &= \sum_{a=0}^{Nr_1} \sum_{b=0}^{Nr_1-a} \sum_{c=0}^{Nr_1-a-b} \binom{Nr_1}{a} \binom{Nr_1-a}{b} \binom{Nr_1-a-b}{c} \\ &\quad (tp)^a ((1-t)p)^b ((1-s)(1-p))^c (s(1-p))^{N-a-b-c} \\ &\quad (a\mu_{T_+} + c\mu_{T_-})(b\mu_{C_+} + (Nr_1 - a - b - c)\mu_{C_-}) \\ &= Nr_1(Nr_1 - 1)(tp\mu_{T_+} + (1-p)(1-s)\mu_{T_-})(p(1-t)\mu_{C_+} + s(1-p)\mu_{C_-}) \end{aligned} \quad (25)$$

$$\begin{aligned} \text{COV} \left[ \sum_{i=1}^{n_{T_\oplus}} y_{T_\oplus,i}, \frac{n_{T_\oplus}}{n_T} \sum_{i=1}^{n_T} y_{T,i} \right] &= \mathbb{E} \left[ \left( \sum_{i=1}^{n_{T_\oplus}} y_{T_\oplus,i} - \mathbb{E} \left[ \sum_{i=1}^{n_{T_\oplus}} y_{T_\oplus,i} \right] \right) \left( n_{T_\oplus} \frac{1}{n_T} \sum_{i=1}^{n_T} y_{T,i} - \mathbb{E} \left[ n_{T_\oplus} \frac{1}{n_T} \sum_{i=1}^{n_T} y_{T,i} \right] \right) \right] \\ &= \mathbb{E} \left[ \left( \sum_{i=1}^{n_{T_\oplus}} y_{T_\oplus,i} \right) n_{T_\oplus} \left( \frac{1}{n_T} \sum_{i=1}^{n_T} y_{T,i} \right) \right] - \mathbb{E} \left[ \sum_{i=1}^{n_{T_\oplus}} y_{T_\oplus,i} \right] \mathbb{E} \left[ n_{T_\oplus} \right] \mathbb{E} \left[ \frac{1}{n_T} \sum_{i=1}^{n_T} y_{T,i} \right] \\ &= \underbrace{\mathbb{E} \left[ \left( \sum_{i=1}^{n_{T_\oplus}} y_{T_\oplus,i} \right) n_{T_\oplus} \right]}_{(21)} \underbrace{\mathbb{E} \left[ \frac{1}{n_T} \sum_{i=1}^{n_T} y_{T,i} \right]}_{(13)} - \underbrace{\mathbb{E} \left[ \sum_{i=1}^{n_{T_\oplus}} y_{T_\oplus,i} \right]}_{(7)} \underbrace{\mathbb{E} \left[ n_{T_\oplus} \right]}_{(2)} \underbrace{\mathbb{E} \left[ \frac{1}{n_T} \sum_{i=1}^{n_T} y_{T,i} \right]}_{(13)} \\ &= Nr_1(1 + Nr_1 p_\oplus - p_\oplus)(tp\mu_{T_+} + (1-p)(1-s)\mu_{T_-})\mu_T \\ &\quad - Nr_1(tp\mu_{T_+} + (1-p)(1-s)\mu_{T_-})Nr_1 p_\oplus \mu_T \\ &= Nr_1 \mu_T (tp\mu_{T_+} + (1-p)(1-s)\mu_{T_-})(1 - p_\oplus) \end{aligned} \quad (26)$$

$$\begin{aligned} \text{COV} \left[ \sum_{i=1}^{n_{C_\ominus}} y_{C_\ominus,i}, \frac{n_{C_\ominus}}{n_C} \sum_{i=1}^{n_C} y_{C,i} \right] &= \mathbb{E} \left[ \left( \sum_{i=1}^{n_{C_\ominus}} y_{C_\ominus,i} - \mathbb{E} \left[ \sum_{i=1}^{n_{C_\ominus}} y_{C_\ominus,i} \right] \right) \left( n_{C_\ominus} \frac{1}{n_C} \sum_{i=1}^{n_C} y_{C,i} - \mathbb{E} \left[ n_{C_\ominus} \frac{1}{n_C} \sum_{i=1}^{n_C} y_{C,i} \right] \right) \right] \\ &= \mathbb{E} \left[ \left( \sum_{i=1}^{n_{C_\ominus}} y_{C_\ominus,i} \right) n_{C_\ominus} \left( \frac{1}{n_C} \sum_{i=1}^{n_C} y_{C,i} \right) \right] - \mathbb{E} \left[ \sum_{i=1}^{n_{C_\ominus}} y_{C_\ominus,i} \right] \mathbb{E} \left[ n_{C_\ominus} \right] \mathbb{E} \left[ \frac{1}{n_C} \sum_{i=1}^{n_C} y_{C,i} \right] \\ &= \underbrace{\mathbb{E} \left[ \left( \sum_{i=1}^{n_{C_\ominus}} y_{C_\ominus,i} \right) n_{C_\ominus} \right]}_{(22)} \underbrace{\mathbb{E} \left[ \frac{1}{n_C} \sum_{i=1}^{n_C} y_{C,i} \right]}_{(15)} - \underbrace{\mathbb{E} \left[ \sum_{i=1}^{n_{C_\ominus}} y_{C_\ominus,i} \right]}_{(10)} \underbrace{\mathbb{E} \left[ n_{C_\ominus} \right]}_{(4)} \underbrace{\mathbb{E} \left[ \frac{1}{n_C} \sum_{i=1}^{n_C} y_{C,i} \right]}_{(15)} \\ &= Nr_1(1 + Nr_1 p_\ominus - p_\ominus)((1-t)p\mu_{C_-} + (1-p)(1-s)\mu_{C_-})\mu_C \\ &\quad - Nr_1((1-t)p\mu_{C_-} + (1-p)(1-s)\mu_{C_-})Nr_1 p_\ominus \mu_C \\ &= Nr_1 \mu_C ((1-t)p\mu_{C_+} + (1-p)s\mu_{C_-})(1 - p_\ominus) \end{aligned} \quad (27)$$

$$\begin{aligned} \text{COV} \left[ \sum_{i=1}^{n_{T\oplus}} y_{T\oplus,i}, \sum_{i=1}^{n_{C\ominus}} y_{C\ominus,i} \right] &= \underbrace{\text{E} \left[ \left( \sum_{i=1}^{n_{T\oplus}} y_{T\oplus,i} \right) \left( \sum_{i=1}^{n_{C\ominus}} y_{C\ominus,i} \right) \right]}_{(25)} - \underbrace{\text{E} \left[ \sum_{i=1}^{n_{T\oplus}} y_{T\oplus,i} \right]}_{(7)} \underbrace{\text{E} \left[ \sum_{i=1}^{n_{C\ominus}} y_{C\ominus,i} \right]}_{(10)} \\ &= -Nr_1 (tp\mu_{T_+} + (1-p)(1-s)\mu_{T_-}) ((1-t)p\mu_{C_+} + s(1-p)\mu_{C_-}) \end{aligned} \quad (28)$$

$$\begin{aligned} \text{COV} \left[ \sum_{i=1}^{n_{T\oplus}} y_{T\oplus,i}, \frac{n_{C\ominus}}{n_C} \sum_{i=1}^{n_C} y_{C,i} \right] &= \underbrace{\text{E} \left[ \left( \sum_{i=1}^{n_{T\oplus}} y_{T\oplus,i} \right) n_{C\ominus} \right]}_{(23)} \underbrace{\text{E} \left[ \frac{1}{n_C} \sum_{i=1}^{n_C} y_{C,i} \right]}_{(15)} - \underbrace{\text{E} \left[ \sum_{i=1}^{n_{T\oplus}} y_{T\oplus,i} \right]}_{(7)} \underbrace{\text{E} \left[ \frac{n_{C\ominus}}{n_C} \sum_{i=1}^{n_C} y_{C,i} \right]}_{(19)} \\ &= -Nr_1 p_{\ominus} \mu_C (tp\mu_{T_+} + (1-p)(1-s)\mu_{T_-}) \end{aligned} \quad (29)$$

$$\text{COV} \left[ \sum_{i=1}^{n_{C\ominus}} y_{C\ominus,i}, \frac{n_{T\oplus}}{n_T} \sum_{i=1}^{n_T} y_{T,i} \right] = -Nr_1 p_{\oplus} \mu_T ((1-t)p\mu_{C_+} + s(1-p)\mu_{C_-}) \quad (30)$$

$$\begin{aligned} \text{COV} \left[ \frac{n_{T\oplus}}{n_T} \sum_{i=1}^{n_T} y_{T,i}, \frac{n_{C\ominus}}{n_C} \sum_{i=1}^{n_C} y_{C,i} \right] &= \text{E} \left[ \frac{n_{T\oplus}}{n_T} \sum_{i=1}^{n_T} y_{T,i} \frac{n_{C\oplus}}{n_C} \sum_{i=1}^{n_C} y_{C,i} \right] - \text{E} \left[ \frac{n_{T\oplus}}{n_T} \sum_{i=1}^{n_T} y_{T,i} \right] \text{E} \left[ \frac{n_{C\ominus}}{n_C} \sum_{i=1}^{n_C} y_{C,i} \right] \\ &= \text{E} [n_{T\oplus} n_{C\ominus}] \text{E} \left[ \frac{1}{n_T} \sum_{i=1}^{n_T} y_{T,i} \frac{1}{n_C} \sum_{i=1}^{n_C} y_{C,i} \right] \\ &\quad - \text{E} \left[ \frac{n_{T\oplus}}{n_T} \sum_{i=1}^{n_T} y_{T,i} \right] \text{E} \left[ \frac{n_{C\ominus}}{n_C} \sum_{i=1}^{n_C} y_{C,i} \right] \\ &= \left( \underbrace{\text{E} [n_{T\oplus}]}_{(2)} \underbrace{\text{E} [n_{C\ominus}]}_{(4)} + \underbrace{\text{COV} [n_{T\oplus}, n_{C\ominus}]}_{(6)} \right) \underbrace{\text{E} \left[ \frac{1}{n_T} \sum_{i=1}^{n_T} y_{T,i} \right]}_{(13)} \underbrace{\text{E} \left[ \frac{1}{n_C} \sum_{i=1}^{n_C} y_{C,i} \right]}_{(15)} \\ &\quad - \underbrace{\text{E} \left[ \frac{n_{T\oplus}}{n_T} \sum_{i=1}^{n_T} y_{T,i} \right]}_{(17)} \underbrace{\text{E} \left[ \frac{n_{C\ominus}}{n_C} \sum_{i=1}^{n_C} y_{C,i} \right]}_{(19)} \end{aligned} \quad (31)$$

## 2 Traditional analysis

$$\begin{aligned}
E[Z_{BM} - Z_R] &= E\left[\frac{1}{Nr_1} \left(\sum_{i=1}^{n_{T\oplus}} y_{T\oplus,i} + \sum_{i=1}^{n_{C\ominus}} y_{C\ominus,i}\right)\right] - E\left[\frac{1}{N(1-r_1)} \left(\sum_{i=1}^{n_T} y_{T,i} + \sum_{i=1}^{n_C} y_{C,i}\right)\right] \\
&= \frac{1}{Nr_1} E\left[\underbrace{\sum_{i=1}^{n_{T\oplus}} y_{T\oplus,i}}_{(7)}\right] + \frac{1}{Nr_1} E\left[\underbrace{\sum_{i=1}^{n_{C\ominus}} y_{C\ominus,i}}_{(10)}\right] \\
&\quad - \frac{N(1-r_1)r_2}{N(1-r_1)} E\left[\underbrace{\frac{1}{n_T} \sum_{i=1}^{n_T} y_{T,i}}_{(13)}\right] - \frac{N(1-r_1)(1-r_2)}{N(1-r_1)} E\left[\underbrace{\frac{1}{n_C} \sum_{i=1}^{n_C} y_{C,i}}_{(15)}\right] \tag{32}
\end{aligned}$$

$$\begin{aligned}
\text{VAR}[Z_{BM} - Z_R] &= \text{VAR}[Z_{BM}] + \text{VAR}[Z_R] - 2\text{COV}[Z_{BM}, Z_R] \\
&= \frac{1}{Nr_1} \text{VAR}\left[\underbrace{\sum_{i=1}^{n_{T\oplus}} y_{T\oplus,i}}_{(8)}\right] + \frac{1}{Nr_1} \text{VAR}\left[\underbrace{\sum_{i=1}^{n_{C\ominus}} y_{C\ominus,i}}_{(11)}\right] + 2\frac{1}{(Nr_1)^2} \text{COV}\left[\underbrace{\sum_{i=1}^{n_{T\oplus}} y_{T\oplus,i}}_{(28)}, \underbrace{\sum_{i=1}^{n_{C\ominus}} y_{C\ominus,i}}_{(28)}\right] \\
&\quad + \frac{(N(1-r_1)r_2)^2}{N(1-r_1)} \text{VAR}\left[\underbrace{\frac{1}{n_T} \sum_{i=1}^{n_T} y_{T,i}}_{(14)}\right] + \frac{(N(1-r_1)(1-r_2))^2}{N(1-r_1)} \text{VAR}\left[\underbrace{\frac{1}{n_C} \sum_{i=1}^{n_C} y_{C,i}}_{(16)}\right] \\
&\quad + 2\frac{1}{(N(1-r_1))^2} \text{COV}\left[\underbrace{\sum_{i=1}^{n_T} y_{T,i}}_{(14)}, \underbrace{\sum_{i=1}^{n_C} y_{C,i}}_{(16)}\right] \\
&\quad - 2\frac{1}{N^2r_1(1-r_1)} \text{COV}\left[\underbrace{\sum_{i=1}^{n_{T\oplus}} y_{T\oplus,i} + \sum_{i=1}^{n_{C\ominus}} y_{C\ominus,i}}_{(8)}, \underbrace{\sum_{i=1}^{n_T} y_{T,i} + \sum_{i=1}^{n_C} y_{C,i}}_{(14)}\right] \tag{33}
\end{aligned}$$

## 3 Alternative analysis method

### 3.1 Treatment effect

The expected value and variance for the test statistic for the treatment effect is given by (see Equations (29) and (30) in the main article):

$$\begin{aligned}
E[Z_{TR} - Z_{CR}] &= E\left[\underbrace{\frac{1}{n_T} \sum_{i=1}^{n_T} y_{T,i}}_{(13)}\right] - E\left[\underbrace{\frac{1}{n_C} \sum_{i=1}^{n_C} y_{C,i}}_{(15)}\right] = p(\mu_{T_+} - \mu_{C_+}) + (1-p)(\mu_{T_-} - \mu_{C_-}) \\
&= p\mu_{T_+} + (1-p)\mu_{T_-} - (p\mu_{C_+} + (1-p)\mu_{C_-}) = \mu_T - \mu_C \tag{34} \\
\text{VAR}[Z_{TR} - Z_{CR}] &= \text{VAR}\left[\underbrace{\frac{1}{n_T} \sum_{i=1}^{n_T} y_{T,i}}_{(14)}\right] + \text{VAR}\left[\underbrace{\frac{1}{n_C} \sum_{i=1}^{n_C} y_{C,i}}_{(16)}\right] - 2\text{COV}\left[\underbrace{\frac{1}{n_T} \sum_{i=1}^{n_T} y_{T,i}}_{(14)}, \underbrace{\frac{1}{n_C} \sum_{i=1}^{n_C} y_{C,i}}_{(16)}\right] \\
&= \frac{p(\mu_{T_+}^2 + \sigma_{T_+}^2) + (1-p)(\mu_{T_-}^2 + \sigma_{T_-}^2) - (p\mu_{T_+} + (1-p)\mu_{T_-})^2}{N(1-r_1)r_2} \\
&\quad + \frac{p(\mu_{C_+}^2 + \sigma_{C_+}^2) + (1-p)(\mu_{C_-}^2 + \sigma_{C_-}^2) - (p\mu_{C_+} + (1-p)\mu_{C_-})^2}{N(1-r_1)(1-r_2)} \\
&= \frac{\sigma_T^2}{N(1-r_1)r_2} + \frac{\sigma_C^2}{N(1-r_1)(1-r_2)}. \tag{35}
\end{aligned}$$

## 3.2 Biomarker and interaction effect

Let  $Z_T$  and  $Z_C$  be defined as follows (see Equations (8) and (9) in main article):

$$Z_T = \sum_{i=1}^{n_{T\oplus}} y_{T\oplus,i} - \frac{n_{T\oplus}}{n_T} \sum_{i=1}^{n_T} y_{T,i} \quad (36)$$

$$Z_C = \sum_{i=1}^{n_{C\ominus}} y_{C\ominus,i} - \frac{n_{C\ominus}}{n_C} \sum_{i=1}^{n_C} y_{C,i}. \quad (37)$$

The expected values are given by:

$$\begin{aligned} E[Z_T] &= E \left[ \sum_{i=1}^{n_{T\oplus}} y_{T\oplus,i} - \frac{n_{T\oplus}}{n_T} \sum_{i=1}^{n_T} y_{T,i} \right] = E \left[ \underbrace{\sum_{i=1}^{n_{T\oplus}} y_{T\oplus,i}}_{(7)} \right] - E \left[ \underbrace{\frac{n_{T\oplus}}{n_T} \sum_{i=1}^{n_T} y_{T,i}}_{(17)} \right] \\ &= Nr_1(tp\mu_{T_+} + (1-p)(1-s)\mu_{T_-}) - Nr_1(tp + (1-p)(1-s))\mu_T \\ &= Nr_1p(1-p)(1-s-t)(\mu_{T_-} - \mu_{T_+}) \end{aligned} \quad (38)$$

$$\begin{aligned} E[Z_C] &= E \left[ \sum_{i=1}^{n_{C\ominus}} y_{C\ominus,i} - \frac{n_{C\ominus}}{n_C} \sum_{i=1}^{n_C} y_{C,i} \right] = E \left[ \underbrace{\sum_{i=1}^{n_{C\ominus}} y_{C\ominus,i}}_{(10)} \right] - E \left[ \underbrace{\frac{n_{C\ominus}}{n_C} \sum_{i=1}^{n_C} y_{C,i}}_{(19)} \right] \\ &= Nr_1((1-t)p\mu_{C_+} + s(1-p)\mu_{C_-}) - Nr_1(p(1-t) + s(1-p))\mu_C \\ &= Nr_1p(1-p)(1-s-t)(\mu_{C_+} - \mu_{C_-}) \end{aligned} \quad (39)$$

The variances are given by:

$$\begin{aligned} \text{VAR}[Z_T] &= \text{VAR} \left[ \sum_{i=1}^{n_{T\oplus}} y_{T\oplus,i} - \frac{n_{T\oplus}}{n_T} \sum_{i=1}^{n_T} y_{T,i} \right] \\ &= \underbrace{\text{VAR} \left[ \sum_{i=1}^{n_{T\oplus}} y_{T\oplus,i} \right]}_{(8)} + \underbrace{\text{VAR} \left[ \frac{n_{T\oplus}}{n_T} \sum_{i=1}^{n_T} y_{T,i} \right]}_{(18)} - 2 \underbrace{\text{COV} \left[ \sum_{i=1}^{n_{T\oplus}} y_{T\oplus,i}, \frac{n_{T\oplus}}{n_T} \sum_{i=1}^{n_T} y_{T,i} \right]}_{(26)} \\ &= Nr_1 \left( pt(\mu_{T_+}^2 + \sigma_{T_+}^2) + (1-p)(1-s)(\mu_{T_-}^2 + \sigma_{T_-}^2) - (pt\mu_{T_+} + (1-p)(1-s)\mu_{T_-})^2 \right) \\ &\quad + Nr_1p_{\oplus}(1-p_{\oplus})\mu_T^2 + ((Nr_1p_{\oplus})^2 + Nr_1p_{\oplus}(1-p_{\oplus})) \frac{\sigma_T^2}{N(1-r_1)r_2} \\ &\quad - 2(Nr_1\mu_T(tp\mu_{T_+} + (1-p)(1-s)\mu_{T_-}))(1-p_{\oplus}) \end{aligned} \quad (40)$$

$$\begin{aligned} \text{VAR}[Z_C] &= \text{VAR} \left[ \sum_{i=1}^{n_{C\ominus}} y_{C\ominus,i} - \frac{n_{C\ominus}}{n_C} \sum_{i=1}^{n_C} y_{C,i} \right] \\ &= \underbrace{\text{VAR} \left[ \sum_{i=1}^{n_{C\ominus}} y_{C\ominus,i} \right]}_{(11)} + \underbrace{\text{VAR} \left[ \frac{n_{C\ominus}}{n_C} \sum_{i=1}^{n_C} y_{C,i} \right]}_{(20)} - 2 \underbrace{\text{COV} \left[ \sum_{i=1}^{n_{C\ominus}} y_{C\ominus,i}, \frac{n_{C\ominus}}{n_C} \sum_{i=1}^{n_C} y_{C,i} \right]}_{(27)} \\ &= Nr_1 \left( p(1-t)(\mu_{C_+}^2 + \sigma_{C_+}^2) + (1-p)s(\mu_{C_-}^2 + \sigma_{C_-}^2) - (p(1-t)\mu_{C_+} + (1-p)s\mu_{C_-})^2 \right) \\ &\quad + Nr_1p_{\ominus}(1-p_{\ominus})\mu_C^2 + ((Nr_1p_{\ominus})^2 + Nr_1p_{\ominus}(1-p_{\ominus})) \frac{\sigma_C^2}{N(1-r_1)(1-r_2)} \\ &\quad - 2(Nr_1\mu_C((1-t)p\mu_{C_+} + (1-p)s\mu_{C_-}))(1-p_{\ominus}) \end{aligned} \quad (41)$$



and the covariance by:

$$\begin{aligned}
\text{COV}[Z_T, Z_C] &= \underbrace{\text{COV}\left[\sum_{i=1}^{n_{T\oplus}} y_{T\oplus,i}, \sum_{i=1}^{n_{C\ominus}} y_{C\ominus,i}\right]}_{(28)} - \underbrace{\text{COV}\left[\sum_{i=1}^{n_{T\oplus}} y_{T\oplus,i}, \frac{n_{C\ominus}}{n_C} \sum_{i=1}^{n_C} y_{C,i}\right]}_{(29)} \\
&\quad - \underbrace{\text{COV}\left[\sum_{i=1}^{n_{C\ominus}} y_{C\ominus,i}, \frac{n_{T\oplus}}{n_T} \sum_{i=1}^{n_T} y_{n_T,i}\right]}_{(30)} + \underbrace{\text{COV}\left[\frac{n_{T\oplus}}{n_T} \sum_{i=1}^{n_T} y_{n_T,i}, \frac{n_{C\ominus}}{n_C} \sum_{i=1}^{n_C} y_{C,i}\right]}_{(31)} \quad (42)
\end{aligned}$$

### 3.3 Covariance structure of the test statistics

$$\begin{aligned}
\text{COV}_{T,B} &= \text{COV}[T_T, T_B] = \text{COV}\left[\frac{Z_{TR} - Z_{CR}}{\sqrt{\text{VAR}[Z_{TR} - Z_{CR}]}} \frac{Z_T - Z_C}{\sqrt{\text{VAR}[Z_T - Z_C]}}\right] \\
&= \frac{\text{COV}[Z_{TR} - Z_{CR}, Z_T - Z_C]}{\sqrt{\text{VAR}[Z_{TR} - Z_{CR}]} \sqrt{\text{VAR}[Z_T - Z_C]}} \\
&= \frac{\text{COV}\left[\frac{1}{n_T} \sum_{i=1}^{n_T} y_{i,T} - \frac{1}{n_C} \sum_{i=1}^{n_C} y_{i,C}, \frac{1}{n_{T\oplus}} \sum_{i=1}^{n_{T\oplus}} y_{i,T\oplus} - \frac{n_{T\oplus}}{n_T} \sum_{i=1}^{n_T} y_{i,T} - \frac{1}{n_{C\ominus}} \sum_{i=1}^{n_{C\ominus}} y_{i,C\ominus} + \frac{n_{C\ominus}}{n_C} \sum_{i=1}^{n_C} y_{i,C}\right]}{\sqrt{\frac{r_2\sigma_C^2 + (1-r_2)\sigma_T^2}{N(1-r_1)r_2(1-r_2)} (\text{VAR}[Z_T] + \text{VAR}[Z_C] - 2\text{COV}[Z_T, Z_C])}} \\
&= \frac{1}{\sqrt{\frac{r_2\sigma_C^2 + (1-r_2)\sigma_T^2}{N(1-r_1)r_2(1-r_2)} (\text{VAR}[Z_T] + \text{VAR}[Z_C] - 2\text{COV}[Z_T, Z_C])}} \\
&\quad \left( \underbrace{\text{COV}\left[\frac{1}{n_T} \sum_{i=1}^{n_T} y_{i,T}, \frac{1}{n_{T\oplus}} \sum_{i=1}^{n_{T\oplus}} y_{i,T\oplus}\right]}_{=0} - \text{COV}\left[\frac{1}{n_T} \sum_{i=1}^{n_T} y_{i,T}, \frac{n_{T\oplus}}{n_T} \sum_{i=1}^{n_T} y_{i,T}\right] \right. \\
&\quad - \underbrace{\text{COV}\left[\frac{1}{n_T} \sum_{i=1}^{n_T} y_{i,T}, \frac{1}{n_{C\ominus}} \sum_{i=1}^{n_{C\ominus}} y_{i,C\ominus}\right]}_{=0} + \underbrace{\text{COV}\left[\frac{1}{n_T} \sum_{i=1}^{n_T} y_{i,T}, \frac{n_{C\ominus}}{n_C} \sum_{i=1}^{n_C} y_{i,C}\right]}_{=0} \\
&\quad - \underbrace{\text{COV}\left[\frac{1}{n_C} \sum_{i=1}^{n_C} y_{i,C}, \frac{1}{n_{T\oplus}} \sum_{i=1}^{n_{T\oplus}} y_{i,T\oplus}\right]}_{=0} + \underbrace{\text{COV}\left[\frac{1}{n_C} \sum_{i=1}^{n_C} y_{i,C}, \frac{n_{T\oplus}}{n_T} \sum_{i=1}^{n_T} y_{i,T}\right]}_{=0} \\
&\quad \left. + \underbrace{\text{COV}\left[\frac{1}{n_C} \sum_{i=1}^{n_C} y_{i,C}, \frac{1}{n_{C\ominus}} \sum_{i=1}^{n_{C\ominus}} y_{i,C\ominus}\right]}_{=0} - \text{COV}\left[\frac{1}{n_C} \sum_{i=1}^{n_C} y_{i,C}, \frac{n_{C\ominus}}{n_C} \sum_{i=1}^{n_C} y_{i,C}\right] \right) \\
&= \frac{-\text{COV}\left[\frac{1}{n_T} \sum_{i=1}^{n_T} y_{i,T}, \frac{n_{T\oplus}}{n_T} \sum_{i=1}^{n_T} y_{i,T}\right] - \text{COV}\left[\frac{1}{n_C} \sum_{i=1}^{n_C} y_{i,C}, \frac{n_{C\ominus}}{n_C} \sum_{i=1}^{n_C} y_{i,C}\right]}{\sqrt{\frac{r_2\sigma_C^2 + (1-r_2)\sigma_T^2}{N(1-r_1)r_2(1-r_2)} (\text{VAR}[Z_T] + \text{VAR}[Z_C] - 2\text{COV}[Z_T, Z_C])}} \\
&\quad - \left( \text{E}\left[n_{T\oplus} \left(\frac{1}{n_T} \sum_{i=1}^{n_T} y_{i,T}\right)^2\right] - \text{E}\left[\frac{1}{n_T} \sum_{i=1}^{n_T} y_{i,T}\right] \text{E}\left[n_{T\oplus} \frac{1}{n_T} \sum_{i=1}^{n_T} y_{i,T}\right] \right) \\
&= \frac{\sqrt{\frac{r_2\sigma_C^2 + (1-r_2)\sigma_T^2}{N(1-r_1)r_2(1-r_2)} (\text{VAR}[Z_T] + \text{VAR}[Z_C] - 2\text{COV}[Z_T, Z_C])}} \\
&\quad - \left( \text{E}\left[n_{C\ominus} \left(\frac{1}{n_C} \sum_{i=1}^{n_C} y_{i,C}\right)^2\right] - \text{E}\left[\frac{1}{n_C} \sum_{i=1}^{n_C} y_{i,C}\right] \text{E}\left[n_{C\ominus} \frac{1}{n_C} \sum_{i=1}^{n_C} y_{i,C}\right] \right) \\
&\quad + \frac{\sqrt{\frac{r_2\sigma_C^2 + (1-r_2)\sigma_T^2}{N(1-r_1)r_2(1-r_2)} (\text{VAR}[Z_T] + \text{VAR}[Z_C] - 2\text{COV}[Z_T, Z_C])}}
\end{aligned}$$

$$\begin{aligned}
& - \left( \mathbb{E} [n_{T\oplus}] \mathbb{E} \left[ \left( \frac{1}{n_T} \sum_{i=1}^{n_T} y_{i,T} \right)^2 \right] - \mathbb{E} [n_{T\oplus}] \mathbb{E} \left[ \frac{1}{n_T} \sum_{i=1}^{n_T} y_{i,T} \right]^2 \right) \\
& = \frac{\sqrt{\frac{r_2 \sigma_C^2 + (1-r_2) \sigma_T^2}{N(1-r_1)r_2(1-r_2)} (\text{VAR} [Z_T] + \text{VAR} [Z_C] - 2\text{COV} [Z_T, Z_C])}}{\sqrt{\frac{r_2 \sigma_C^2 + (1-r_2) \sigma_T^2}{N(1-r_1)r_2(1-r_2)} (\text{VAR} [Z_T] + \text{VAR} [Z_C] - 2\text{COV} [Z_T, Z_C])}} \\
& - \left( \mathbb{E} [n_{C\ominus}] \mathbb{E} \left[ \left( \frac{1}{n_C} \sum_{i=1}^{n_C} y_{i,C} \right)^2 \right] - \mathbb{E} [n_{C\ominus}] \mathbb{E} \left[ \frac{1}{n_C} \sum_{i=1}^{n_C} y_{i,C} \right]^2 \right) \\
& + \frac{\sqrt{\frac{r_2 \sigma_C^2 + (1-r_2) \sigma_T^2}{N(1-r_1)r_2(1-r_2)} (\text{VAR} [Z_T] + \text{VAR} [Z_C] - 2\text{COV} [Z_T, Z_C])}}{\sqrt{\frac{r_2 \sigma_C^2 + (1-r_2) \sigma_T^2}{N(1-r_1)r_2(1-r_2)} (\text{VAR} [Z_T] + \text{VAR} [Z_C] - 2\text{COV} [Z_T, Z_C])}} \\
& - \left( \mathbb{E} [n_{T\oplus}] \left( \mathbb{V} \left[ \frac{1}{n_T} \sum_{i=1}^{n_T} y_{i,T} \right] + \mathbb{E} \left[ \frac{1}{n_T} \sum_{i=1}^{n_T} y_{i,T} \right]^2 \right) - \mathbb{E} [n_{T\oplus}] \mathbb{E} \left[ \frac{1}{n_T} \sum_{i=1}^{n_T} y_{i,T} \right]^2 \right) \\
& = \frac{\sqrt{\frac{r_2 \sigma_C^2 + (1-r_2) \sigma_T^2}{N(1-r_1)r_2(1-r_2)} (\text{VAR} [Z_T] + \text{VAR} [Z_C] - 2\text{COV} [Z_T, Z_C])}}{\sqrt{\frac{r_2 \sigma_C^2 + (1-r_2) \sigma_T^2}{N(1-r_1)r_2(1-r_2)} (\text{VAR} [Z_T] + \text{VAR} [Z_C] - 2\text{COV} [Z_T, Z_C])}} \\
& - \left( \mathbb{E} [n_{C\ominus}] \left( \mathbb{V} \left[ \frac{1}{n_C} \sum_{i=1}^{n_C} y_{i,C} \right] + \mathbb{E} \left[ \frac{1}{n_C} \sum_{i=1}^{n_C} y_{i,C} \right]^2 \right) - \mathbb{E} [n_{C\ominus}] \mathbb{E} \left[ \frac{1}{n_C} \sum_{i=1}^{n_C} y_{i,C} \right]^2 \right) \\
& + \frac{\sqrt{\frac{r_2 \sigma_C^2 + (1-r_2) \sigma_T^2}{N(1-r_1)r_2(1-r_2)} (\text{VAR} [Z_T] + \text{VAR} [Z_C] - 2\text{COV} [Z_T, Z_C])}}{\sqrt{\frac{r_2 \sigma_C^2 + (1-r_2) \sigma_T^2}{N(1-r_1)r_2(1-r_2)} (\text{VAR} [Z_T] + \text{VAR} [Z_C] - 2\text{COV} [Z_T, Z_C])}} \\
& = \frac{\underbrace{-\mathbb{E} [n_{T\oplus}]}_{(2)} \underbrace{\mathbb{V} \left[ \frac{1}{n_T} \sum_{i=1}^{n_T} y_{i,T} \right]}_{(14)} - \underbrace{\mathbb{E} [n_{C\ominus}]}_{(4)} \underbrace{\mathbb{V} \left[ \frac{1}{n_C} \sum_{i=1}^{n_C} y_{i,C} \right]}_{(16)}}{\sqrt{\frac{r_2 \sigma_C^2 + (1-r_2) \sigma_T^2}{N(1-r_1)r_2(1-r_2)} (\underbrace{\text{VAR} [Z_T]}_{(40)} + \underbrace{\text{VAR} [Z_C]}_{(41)} - 2\underbrace{\text{COV} [Z_T, Z_C]}_{(42)})}} \tag{43} \\
& \text{COV}_{T,I} = \text{COV} [T_T, T_I] = \text{COV} \left[ \frac{Z_{TR} - Z_{CR}}{\sqrt{\text{VAR} [Z_{TR} - Z_{CR}]}} \underbrace{\phantom{\frac{Z_{TR} - Z_{CR}}{\sqrt{\text{VAR} [Z_{TR} - Z_{CR}]}}}}_{(35)}, \frac{Z_T + Z_C}{\sqrt{\text{VAR} [Z_T + Z_C]}} \right] \\
& = \frac{\text{COV} [Z_{TR} - Z_{CR}, Z_T + Z_C]}{\sqrt{\text{VAR} [Z_{TR} - Z_{CR}]} \sqrt{\text{VAR} [Z_T + Z_C]}} \\
& = \frac{\text{COV} \left[ \frac{1}{n_T} \sum_{i=1}^{n_T} y_{i,T} - \frac{1}{n_C} \sum_{i=1}^{n_C} y_{i,C}, \frac{1}{n_{T\oplus}} \sum_{i=1}^{n_{T\oplus}} y_{i,T\oplus} - \frac{n_{T\oplus}}{n_T} \sum_{i=1}^{n_T} y_{i,T} + \frac{1}{n_{C\ominus}} \sum_{i=1}^{n_{C\ominus}} y_{i,C\ominus} - \frac{n_{C\ominus}}{n_C} \sum_{i=1}^{n_C} y_{i,C} \right]}{\sqrt{\frac{r_2 \sigma_C^2 + (1-r_2) \sigma_T^2}{N(1-r_1)r_2(1-r_2)} (\text{VAR} [Z_T] + \text{VAR} [Z_C] + 2\text{COV} [Z_T, Z_C])}} \\
& = \frac{1}{\sqrt{\frac{r_2 \sigma_C^2 + (1-r_2) \sigma_T^2}{N(1-r_1)r_2(1-r_2)} (\text{VAR} [Z_T] + \text{VAR} [Z_C] + 2\text{COV} [Z_T, Z_C])}} \\
& \left( \underbrace{\text{COV} \left[ \frac{1}{n_T} \sum_{i=1}^{n_T} y_{i,T}, \frac{1}{n_{T\oplus}} \sum_{i=1}^{n_{T\oplus}} y_{i,T\oplus} \right]}_{=0} - \text{COV} \left[ \frac{1}{n_T} \sum_{i=1}^{n_T} y_{i,T}, \frac{n_{T\oplus}}{n_T} \sum_{i=1}^{n_T} y_{i,T} \right] \right. \\
& + \underbrace{\text{COV} \left[ \frac{1}{n_T} \sum_{i=1}^{n_T} y_{i,T}, \frac{1}{n_{C\ominus}} \sum_{i=1}^{n_{C\ominus}} y_{i,C\ominus} \right]}_{=0} - \underbrace{\text{COV} \left[ \frac{1}{n_T} \sum_{i=1}^{n_T} y_{i,T}, \frac{n_{C\ominus}}{n_C} \sum_{i=1}^{n_C} y_{i,C} \right]}_{=0} \\
& - \underbrace{\text{COV} \left[ \frac{1}{n_C} \sum_{i=1}^{n_C} y_{i,C}, \frac{1}{n_{T\oplus}} \sum_{i=1}^{n_{T\oplus}} y_{i,T\oplus} \right]}_{=0} + \underbrace{\text{COV} \left[ \frac{1}{n_C} \sum_{i=1}^{n_C} y_{i,C}, \frac{n_{T\oplus}}{n_T} \sum_{i=1}^{n_T} y_{i,T} \right]}_{=0} \\
& \left. - \underbrace{\text{COV} \left[ \frac{1}{n_C} \sum_{i=1}^{n_C} y_{i,C}, \frac{1}{n_{C\ominus}} \sum_{i=1}^{n_{C\ominus}} y_{i,C\ominus} \right]}_{=0} + \text{COV} \left[ \frac{1}{n_C} \sum_{i=1}^{n_C} y_{i,C}, \frac{n_{C\ominus}}{n_C} \sum_{i=1}^{n_C} y_{i,C} \right] \right)
\end{aligned}$$

$$\begin{aligned}
& -\text{COV} \left[ \frac{1}{n_T} \sum_{i=1}^{n_T} y_{i,T}, \frac{n_{T\oplus}}{n_T} \sum_{i=1}^{n_T} y_{i,T} \right] + \text{COV} \left[ \frac{1}{n_C} \sum_{i=1}^{n_C} y_{i,C}, \frac{n_{C\ominus}}{n_C} \sum_{i=1}^{n_C} y_{i,C} \right] \\
&= \frac{-\text{COV} \left[ \frac{1}{n_T} \sum_{i=1}^{n_T} y_{i,T}, \frac{n_{T\oplus}}{n_T} \sum_{i=1}^{n_T} y_{i,T} \right] + \text{COV} \left[ \frac{1}{n_C} \sum_{i=1}^{n_C} y_{i,C}, \frac{n_{C\ominus}}{n_C} \sum_{i=1}^{n_C} y_{i,C} \right]}{\sqrt{\frac{r_2\sigma_C^2+(1-r_2)\sigma_T^2}{N(1-r_1)r_2(1-r_2)}} (\text{VAR} [Z_T] + \text{VAR} [Z_C] + 2\text{COV} [Z_T, Z_C])} \\
& - \left( \text{E} \left[ n_{T\oplus} \left( \frac{1}{n_T} \sum_{i=1}^{n_T} y_{i,T} \right)^2 \right] - \text{E} \left[ \frac{1}{n_T} \sum_{i=1}^{n_T} y_{i,T} \right] \text{E} \left[ n_{T\oplus} \frac{1}{n_T} \sum_{i=1}^{n_T} y_{i,T} \right] \right) \\
&= \frac{-\left( \text{E} \left[ n_{T\oplus} \left( \frac{1}{n_T} \sum_{i=1}^{n_T} y_{i,T} \right)^2 \right] - \text{E} \left[ \frac{1}{n_T} \sum_{i=1}^{n_T} y_{i,T} \right] \text{E} \left[ n_{T\oplus} \frac{1}{n_T} \sum_{i=1}^{n_T} y_{i,T} \right] \right)}{\sqrt{\frac{r_2\sigma_C^2+(1-r_2)\sigma_T^2}{N(1-r_1)r_2(1-r_2)}} (\text{VAR} [Z_T] + \text{VAR} [Z_C] + 2\text{COV} [Z_T, Z_C])} \\
& + \frac{\left( \text{E} \left[ n_{C\ominus} \left( \frac{1}{n_C} \sum_{i=1}^{n_C} y_{i,C} \right)^2 \right] - \text{E} \left[ \frac{1}{n_C} \sum_{i=1}^{n_C} y_{i,C} \right] \text{E} \left[ n_{C\ominus} \frac{1}{n_C} \sum_{i=1}^{n_C} y_{i,C} \right] \right)}{\sqrt{\frac{r_2\sigma_C^2+(1-r_2)\sigma_T^2}{N(1-r_1)r_2(1-r_2)}} (\text{VAR} [Z_T] + \text{VAR} [Z_C] + 2\text{COV} [Z_T, Z_C])} \\
& - \left( \text{E} [n_{T\oplus}] \text{E} \left[ \left( \frac{1}{n_T} \sum_{i=1}^{n_T} y_{i,T} \right)^2 \right] - \text{E} [n_{T\oplus}] \text{E} \left[ \frac{1}{n_T} \sum_{i=1}^{n_T} y_{i,T} \right]^2 \right) \\
&= \frac{-\left( \text{E} [n_{T\oplus}] \text{E} \left[ \left( \frac{1}{n_T} \sum_{i=1}^{n_T} y_{i,T} \right)^2 \right] - \text{E} [n_{T\oplus}] \text{E} \left[ \frac{1}{n_T} \sum_{i=1}^{n_T} y_{i,T} \right]^2 \right)}{\sqrt{\frac{r_2\sigma_C^2+(1-r_2)\sigma_T^2}{N(1-r_1)r_2(1-r_2)}} (\text{VAR} [Z_T] + \text{VAR} [Z_C] + 2\text{COV} [Z_T, Z_C])} \\
& + \frac{\left( \text{E} [n_{C\ominus}] \text{E} \left[ \left( \frac{1}{n_C} \sum_{i=1}^{n_C} y_{i,C} \right)^2 \right] - \text{E} [n_{C\ominus}] \text{E} \left[ \frac{1}{n_C} \sum_{i=1}^{n_C} y_{i,C} \right]^2 \right)}{\sqrt{\frac{r_2\sigma_C^2+(1-r_2)\sigma_T^2}{N(1-r_1)r_2(1-r_2)}} (\text{VAR} [Z_T] + \text{VAR} [Z_C] + 2\text{COV} [Z_T, Z_C])} \\
& - \left( \text{E} [n_{T\oplus}] \left( \text{V} \left[ \frac{1}{n_T} \sum_{i=1}^{n_T} y_{i,T} \right] + \text{E} \left[ \frac{1}{n_T} \sum_{i=1}^{n_T} y_{i,T} \right]^2 \right) - \text{E} [n_{T\oplus}] \text{E} \left[ \frac{1}{n_T} \sum_{i=1}^{n_T} y_{i,T} \right]^2 \right) \\
&= \frac{-\left( \text{E} [n_{T\oplus}] \left( \text{V} \left[ \frac{1}{n_T} \sum_{i=1}^{n_T} y_{i,T} \right] + \text{E} \left[ \frac{1}{n_T} \sum_{i=1}^{n_T} y_{i,T} \right]^2 \right) - \text{E} [n_{T\oplus}] \text{E} \left[ \frac{1}{n_T} \sum_{i=1}^{n_T} y_{i,T} \right]^2 \right)}{\sqrt{\frac{r_2\sigma_C^2+(1-r_2)\sigma_T^2}{N(1-r_1)r_2(1-r_2)}} (\text{VAR} [Z_T] + \text{VAR} [Z_C] + 2\text{COV} [Z_T, Z_C])} \\
& + \frac{\left( \text{E} [n_{C\ominus}] \left( \text{V} \left[ \frac{1}{n_C} \sum_{i=1}^{n_C} y_{i,C} \right] + \text{E} \left[ \frac{1}{n_C} \sum_{i=1}^{n_C} y_{i,C} \right]^2 \right) - \text{E} [n_{C\ominus}] \text{E} \left[ \frac{1}{n_C} \sum_{i=1}^{n_C} y_{i,C} \right]^2 \right)}{\sqrt{\frac{r_2\sigma_C^2+(1-r_2)\sigma_T^2}{N(1-r_1)r_2(1-r_2)}} (\text{VAR} [Z_T] + \text{VAR} [Z_C] + 2\text{COV} [Z_T, Z_C])} \\
&= \frac{-\text{E} [n_{T\oplus}] \text{V} \left[ \frac{1}{n_T} \sum_{i=1}^{n_T} y_{i,T} \right] + \text{E} [n_{C\ominus}] \text{V} \left[ \frac{1}{n_C} \sum_{i=1}^{n_C} y_{i,C} \right]}{\sqrt{\frac{r_2\sigma_C^2+(1-r_2)\sigma_T^2}{N(1-r_1)r_2(1-r_2)}} \left( \underbrace{\text{VAR} [Z_T]}_{(40)} + \underbrace{\text{VAR} [Z_C]}_{(41)} + 2 \underbrace{\text{COV} [Z_T, Z_C]}_{(42)} \right)} \tag{44}
\end{aligned}$$

$$\begin{aligned}
\text{COV}_{B,I} &= \text{COV} [T_B, T_I] = \text{COV} \left[ \frac{Z_T - Z_C}{\sqrt{\text{VAR} [Z_T - Z_C]}}, \frac{Z_T + Z_C}{\sqrt{\text{VAR} [Z_T + Z_C]}} \right] = \frac{\text{COV} [Z_T - Z_C, Z_T + Z_C]}{\sqrt{\text{VAR} [Z_T - Z_C]} \sqrt{\text{VAR} [Z_T + Z_C]}} \\
&= \frac{\text{VAR} [Z_T] - \text{VAR} [Z_C]}{\sqrt{\text{VAR} [Z_T - Z_C]} \sqrt{\text{VAR} [Z_T + Z_C]}} \tag{45}
\end{aligned}$$

## 4 Sample size calculation

### 4.1 Treatment effect

The required sample size for the treatment effect to achieve a power of  $1 - \beta$  using a two-sided significance level  $\alpha$  can be calculated by solving the following equation for  $N$ :

$$\frac{\overbrace{\text{E}[Z_{TR} - Z_{CR}]}^{(34)}}{\underbrace{\sqrt{\text{VAR}[Z_{TR} - Z_{CR}]}}_{(35)}} - z_{1-\alpha/2} = z_{1-\beta} \quad (46)$$

### 4.2 Biomarker and interaction effect

The required sample size for the biomarker and the interaction effect to achieve a power of  $1 - \beta$  using a two-sided significance level  $\alpha$  can be calculated by solving the following equations for  $N$ :

$$\frac{\text{E}[Z_T - Z_C]}{\sqrt{\text{VAR}[Z_T - Z_C]}} - z_{1-\alpha/2} = z_{1-\beta} \quad (47)$$

$$\frac{\text{E}[Z_T + Z_C]}{\sqrt{\text{VAR}[Z_T + Z_C]}} - z_{1-\alpha/2} = z_{1-\beta}. \quad (48)$$

As the only difference between the biomarker and the interaction effect is the sign of  $Z_C$  (being negative for the biomarker effect and positive for the interaction effect), we can simplify the derivations by writing:

$$\frac{\text{E}[Z_T \mp Z_C]}{\sqrt{\text{VAR}[Z_T \mp Z_C]}} - z_{1-\alpha/2} = z_{1-\beta} \quad (49)$$

Note that the expected value  $\text{E}[Z_T \mp Z_C]$  and the variance  $\text{VAR}[Z_T \mp Z_C]$  can be written as:

$$\begin{aligned} \text{E}[Z_T \mp Z_C] &= Nr_1 (\theta_{T_{\oplus}} \mp \theta_{C_{\ominus}} - p_{\oplus}\mu_T \pm p_{\ominus}\mu_C) \quad (50) \\ \text{VAR}[Z_T \mp Z_C] &= Nr_1^2 \left( \frac{\sigma_{T_{\oplus}}^2 + \sigma_{C_{\ominus}}^2 + p_{\oplus}p_{\ominus}(\mu_T^2 + \mu_C^2) - 2(p_{\ominus}\mu_T\theta_{T_{\oplus}}p_{\oplus}\mu_C\theta_{C_{\ominus}})}{r_1} + \frac{(1-r_2)p_{\oplus}^2\sigma_T^2 + r_2p_{\ominus}^2\sigma_C^2}{(1-r_1)r_2(1-r_2)} \right) \\ &\quad + \frac{r_1r_2p_{\oplus}p_{\ominus}\sigma_C^2 + r_1(1-r_2)p_{\oplus}p_{\ominus}\sigma_T^2}{(1-r_1)r_2(1-r_2)} \mp Nr_1(-\theta_{T_{\oplus}}\theta_{C_{\ominus}} - p_{\oplus}p_{\ominus}\mu_T\mu_C + p_{\ominus}\mu_C\theta_{T_{\oplus}} + p_{\oplus}\mu_T\theta_{C_{\ominus}}) \\ &= Nr_1^2 A + B \mp Nr_1 C \quad (51) \end{aligned}$$

with

$$\begin{aligned} A &= \frac{\sigma_{T_{\oplus}}^2 + \sigma_{C_{\ominus}}^2 + p_{\oplus}p_{\ominus}(\mu_T^2 + \mu_C^2) - 2(p_{\ominus}\mu_T\theta_{T_{\oplus}}p_{\oplus}\mu_C\theta_{C_{\ominus}})}{r_1} + \frac{(1-r_2)p_{\oplus}^2\sigma_T^2 + r_2p_{\ominus}^2\sigma_C^2}{(1-r_1)r_2(1-r_2)} \\ B &= \frac{r_1r_2p_{\oplus}p_{\ominus}\sigma_C^2 + r_1(1-r_2)p_{\oplus}p_{\ominus}\sigma_T^2}{(1-r_1)r_2(1-r_2)} \\ C &= -\theta_{T_{\oplus}}\theta_{C_{\ominus}} - p_{\oplus}p_{\ominus}\mu_T\mu_C + p_{\ominus}\mu_C\theta_{T_{\oplus}} + p_{\oplus}\mu_T\theta_{C_{\ominus}} \end{aligned}$$

Hence, we get

$$\begin{aligned} \frac{Nr_1(\theta_{T_{\oplus}} \mp \theta_{C_{\ominus}} - p_{\oplus}\mu_T \pm p_{\ominus}\mu_C)}{\sqrt{Nr_1^2 A + B \mp Nr_1 C}} &= z_{1-\alpha/2} + z_{1-\beta} \\ \Leftrightarrow \frac{(Nr_1)^2}{Nr_1^2 A + B \mp Nr_1 C} &= \left( \frac{z_{1-\alpha/2} + z_{1-\beta}}{\theta_{T_{\oplus}} \mp \theta_{C_{\ominus}} - p_{\oplus}\mu_T \pm p_{\ominus}\mu_C} \right)^2. \quad (52) \end{aligned}$$

Setting

$$D = \left( \frac{z_{1-\alpha/2} + z_{1-\beta}}{\theta_{T_{\oplus}} \mp \theta_{C_{\ominus}} - p_{\oplus}\mu_T \pm p_{\ominus}\mu_C} \right)^2 \quad (53)$$

and dividing by  $r_1^2$  ( $r_1 \neq 0$ ), we get

$$\begin{aligned} N^2 - D \frac{r_1 A \mp C}{r_1} N - D \frac{B}{r_1^2} &= 0 \\ \Leftrightarrow N &= D \frac{r_1 A \mp C}{2r_1} \pm \sqrt{D \left( \frac{r_1 A \mp C}{2r_1} \right)^2 + D \frac{B}{r_1^2}} \end{aligned} \quad (54)$$

## 5 Estimators for the variances of the test statistics

Let  $s_T^2$  and  $s_C^2$  be defined as

$$s_T^2 = \frac{1}{n_T - 1} \sum_{i=1}^{n_T} \left( y_{T,i} - \frac{1}{n_T} \sum_{k=1}^{n_T} y_{T,k} \right)^2 \quad (55)$$

$$s_C^2 = \frac{1}{n_C - 1} \sum_{i=1}^{n_C} \left( y_{C,i} - \frac{1}{n_C} \sum_{k=1}^{n_C} y_{C,k} \right)^2 \quad (56)$$

with

$$\mathbb{E} [s_T^2] = \sigma_T^2 \quad (57)$$

$$\mathbb{E} [s_C^2] = \sigma_C^2 \quad (58)$$

The variances and covariances of  $Z_T$  and  $Z_C$  can be estimated by:

$$\begin{aligned} \widehat{\text{VAR}}[Z_T] &= \frac{1}{Nr_1 - 1} \left( Nr_1 \sum_{i=1}^{n_{T_{\oplus}}} y_{T_{\oplus},i}^2 - \left( \sum_{i=1}^{n_{T_{\oplus}}} y_{T_{\oplus},i} \right)^2 + Nr_1 n_{T_{\oplus}} (n_{T_{\oplus}} - 1) \frac{s_T^2}{n_T} \right. \\ &\quad \left. + Nr_1 n_{T_{\oplus}} \left( 1 - \frac{n_{T_{\oplus}}}{Nr_1} \right) \left( \frac{1}{n_T} \sum_{i=1}^{n_T} y_{T,i} \right)^2 - 2Nr_1 \left( 1 - \frac{n_{T_{\oplus}}}{Nr_1} \right) \left( \sum_{i=1}^{n_{T_{\oplus}}} y_{T_{\oplus},i} \right) \left( \frac{1}{n_T} \sum_{i=1}^{n_T} y_{T,i} \right) \right) \end{aligned} \quad (59)$$

$$\begin{aligned} \widehat{\text{VAR}}[Z_C] &= \frac{1}{Nr_1 - 1} \left( Nr_1 \sum_{i=1}^{n_{C_{\ominus}}} y_{C_{\ominus},i}^2 - \left( \sum_{i=1}^{n_{C_{\ominus}}} y_{C_{\ominus},i} \right)^2 + Nr_1 n_{C_{\ominus}} (n_{C_{\ominus}} - 1) \frac{s_C^2}{n_C} \right. \\ &\quad \left. + Nr_1 n_{C_{\ominus}} \left( 1 - \frac{n_{C_{\ominus}}}{Nr_1} \right) \left( \frac{1}{n_C} \sum_{i=1}^{n_C} y_{C,i} \right)^2 - 2Nr_1 \left( 1 - \frac{n_{C_{\ominus}}}{Nr_1} \right) \left( \sum_{i=1}^{n_{C_{\ominus}}} y_{C_{\ominus},i} \right) \left( \frac{1}{n_C} \sum_{i=1}^{n_C} y_{C,i} \right) \right) \end{aligned} \quad (60)$$

$$\begin{aligned} \widehat{\text{COV}}[Z_T, Z_C] &= \frac{1}{Nr_1 - 1} \left( - \left( \sum_{i=1}^{n_{T_{\oplus}}} y_{T_{\oplus},i} \right) \left( \sum_{i=1}^{n_{C_{\ominus}}} y_{C_{\ominus},i} \right) + \left( \sum_{i=1}^{n_{T_{\oplus}}} y_{T_{\oplus},i} \right) n_{C_{\ominus}} \left( \frac{1}{n_C} \sum_{i=1}^{n_C} y_{C,i} \right) \right. \\ &\quad \left. + \left( \sum_{i=1}^{n_{C_{\ominus}}} y_{C_{\ominus},i} \right) n_{T_{\oplus}} \left( \frac{1}{n_T} \sum_{i=1}^{n_T} y_{T,i} \right) - n_{T_{\oplus}} n_{C_{\ominus}} \left( \frac{1}{n_T} \sum_{i=1}^{n_T} y_{T,i} \right) \left( \frac{1}{n_C} \sum_{i=1}^{n_C} y_{C,i} \right) \right) \end{aligned} \quad (61)$$

In the following, we show that the above estimators are unbiased estimators for the respective quantities.

$$\begin{aligned}
\mathbb{E} \left[ \widehat{\text{VAR}} [Z_T] \right] &= \mathbb{E} \left[ \frac{1}{Nr_1 - 1} \left( Nr_1 \sum_{i=1}^{n_{T_\oplus}} y_{T_\oplus, i}^2 - \left( \sum_{i=1}^{n_{T_\oplus}} y_{T_\oplus, i} \right)^2 + Nr_1 n_{T_\oplus} (n_{T_\oplus} - 1) \frac{s_T^2}{n_T} \right. \right. \\
&\quad \left. \left. + Nr_1 n_{T_\oplus} \left( 1 - \frac{n_{T_\oplus}}{Nr_1} \right) \left( \frac{1}{n_T} \sum_{i=1}^{n_T} y_{T, i} \right)^2 - 2Nr_1 \left( 1 - \frac{n_{T_\oplus}}{Nr_1} \right) \left( \sum_{i=1}^{n_{T_\oplus}} y_{T_\oplus, i} \right) \left( \frac{1}{n_T} \sum_{i=1}^{n_T} y_{T, i} \right) \right) \right] \\
&= \frac{1}{Nr_1 - 1} \left( Nr_1 \mathbb{E} \left[ \sum_{i=1}^{n_{T_\oplus}} y_{T_\oplus, i}^2 \right] - \mathbb{E} \left[ \left( \sum_{i=1}^{n_{T_\oplus}} y_{T_\oplus, i} \right)^2 \right] + Nr_1 \mathbb{E} \left[ n_{T_\oplus} (n_{T_\oplus} - 1) \frac{s_T^2}{n_T} \right] \right. \\
&\quad \left. + Nr_1 \mathbb{E} \left[ n_{T_\oplus} \left( 1 - \frac{n_{T_\oplus}}{Nr_1} \right) \left( \frac{1}{n_T} \sum_{i=1}^{n_T} y_{T, i} \right)^2 \right] - 2Nr_1 \mathbb{E} \left[ \left( 1 - \frac{n_{T_\oplus}}{Nr_1} \right) \left( \sum_{i=1}^{n_{T_\oplus}} y_{T_\oplus, i} \right) \left( \frac{1}{n_T} \sum_{i=1}^{n_T} y_{T, i} \right) \right] \right) \\
&= \frac{1}{Nr_1 - 1} \left( Nr_1 \mathbb{E} \left[ \sum_{i=1}^{n_{T_\oplus}} y_{T_\oplus, i}^2 \right] - \mathbb{E} \left[ \sum_{i=1}^{n_{T_\oplus}} y_{T_\oplus, i} \right]^2 - \text{VAR} \left[ \sum_{i=1}^{n_{T_\oplus}} y_{T_\oplus, i} \right] + Nr_1 \mathbb{E} \left[ n_{T_\oplus}^2 - n_{T_\oplus} \right] \frac{1}{n_T} \mathbb{E} [s_T^2] \right. \\
&\quad \left. + Nr_1 \mathbb{E} \left[ n_{T_\oplus} - \frac{1}{Nr_1} n_{T_\oplus}^2 \right] \mathbb{E} \left[ \left( \frac{1}{n_T} \sum_{i=1}^{n_T} y_{T, i} \right)^2 \right] \right. \\
&\quad \left. - 2Nr_1 \mathbb{E} \left[ \left( 1 - \frac{n_{T_\oplus}}{Nr_1} \right) \left( \sum_{i=1}^{n_{T_\oplus}} y_{T_\oplus, i} \right) \right] \mathbb{E} \left[ \frac{1}{n_T} \sum_{i=1}^{n_T} y_{T, i} \right] \right) \\
&= \frac{1}{Nr_1 - 1} \left( \underbrace{Nr_1 \mathbb{E} \left[ \sum_{i=1}^{n_{T_\oplus}} y_{T_\oplus, i}^2 \right]}_{(9)} - \underbrace{\mathbb{E} \left[ \sum_{i=1}^{n_{T_\oplus}} y_{T_\oplus, i} \right]^2}_{(7)} - \underbrace{\text{VAR} \left[ \sum_{i=1}^{n_{T_\oplus}} y_{T_\oplus, i} \right]}_{(8)} \right. \\
&\quad \left. + Nr_1 \left( \underbrace{\mathbb{E} [n_{T_\oplus}]^2}_{(2)} + \underbrace{\text{VAR} [n_{T_\oplus}]}_{(3)} - \underbrace{\mathbb{E} [n_{T_\oplus}]}_{(2)} \right) \frac{1}{n_T} \underbrace{\mathbb{E} [s_T^2]}_{(57)} \right. \\
&\quad \left. + Nr_1 \left( \underbrace{\mathbb{E} [n_{T_\oplus}]}_{(2)} - \frac{1}{Nr_1} \left( \underbrace{\mathbb{E} [n_{T_\oplus}]^2}_{(2)} + \underbrace{\text{VAR} [n_{T_\oplus}]}_{(3)} \right) \right) \left( \underbrace{\mathbb{E} \left[ \frac{1}{n_T} \sum_{i=1}^{n_T} y_{T, i} \right]^2}_{(13)} + \underbrace{\text{VAR} \left[ \frac{1}{n_T} \sum_{i=1}^{n_T} y_{T, i} \right]}_{(14)} \right) \right. \\
&\quad \left. - 2Nr_1 \left( \underbrace{\mathbb{E} \left[ \sum_{i=1}^{n_{T_\oplus}} y_{T_\oplus, i} \right]}_{(7)} - \frac{1}{Nr_1} \underbrace{\mathbb{E} \left[ n_{T_\oplus} \sum_{i=1}^{n_{T_\oplus}} y_{T_\oplus, i} \right]}_{(21)} \right) \underbrace{\mathbb{E} \left[ \frac{1}{n_T} \sum_{i=1}^{n_T} y_{T, i} \right]}_{(13)} \right) \tag{62}
\end{aligned}$$

$$\begin{aligned}
\mathbb{E} \left[ \widehat{\text{VAR}}[Z_C] \right] &= \mathbb{E} \left[ \frac{1}{Nr_1 - 1} \left( Nr_1 \sum_{i=1}^{n_{C_\ominus}} y_{C_\ominus, i}^2 - \left( \sum_{i=1}^{n_{C_\ominus}} y_{C_\ominus, i} \right)^2 + Nr_1 n_{C_\ominus} (n_{C_\ominus} - 1) \frac{s_C^2}{n_C} \right. \right. \\
&\quad \left. \left. + Nr_1 n_{C_\ominus} \left( 1 - \frac{n_{C_\ominus}}{Nr_1} \right) \left( \frac{1}{n_C} \sum_{i=1}^{n_C} y_{C, i} \right)^2 - 2Nr_1 \left( 1 - \frac{n_{C_\ominus}}{Nr_1} \right) \left( \sum_{i=1}^{n_{C_\ominus}} y_{C_\ominus, i} \right) \left( \frac{1}{n_C} \sum_{i=1}^{n_C} y_{C, i} \right) \right) \right] \\
&= \frac{1}{Nr_1 - 1} \left( Nr_1 \mathbb{E} \left[ \sum_{i=1}^{n_{C_\ominus}} y_{C_\ominus, i}^2 \right] - \mathbb{E} \left[ \left( \sum_{i=1}^{n_{C_\ominus}} y_{C_\ominus, i} \right)^2 \right] + Nr_1 \mathbb{E} \left[ n_{C_\ominus} (n_{C_\ominus} - 1) \frac{s_C^2}{n_C} \right] \right. \\
&\quad \left. + Nr_1 \mathbb{E} \left[ n_{C_\ominus} \left( 1 - \frac{n_{C_\ominus}}{Nr_1} \right) \left( \frac{1}{n_C} \sum_{i=1}^{n_C} y_{C, i} \right)^2 \right] - 2Nr_1 \mathbb{E} \left[ \left( 1 - \frac{n_{C_\ominus}}{Nr_1} \right) \left( \sum_{i=1}^{n_{C_\ominus}} y_{C_\ominus, i} \right) \left( \frac{1}{n_C} \sum_{i=1}^{n_C} y_{C, i} \right) \right] \right) \\
&= \frac{1}{Nr_1 - 1} \left( Nr_1 \mathbb{E} \left[ \sum_{i=1}^{n_{C_\ominus}} y_{C_\ominus, i}^2 \right] - \mathbb{E} \left[ \sum_{i=1}^{n_{C_\ominus}} y_{C_\ominus, i} \right]^2 - \text{VAR} \left[ \sum_{i=1}^{n_{C_\ominus}} y_{C_\ominus, i} \right] + Nr_1 \mathbb{E} \left[ n_{C_\ominus}^2 - n_{C_\ominus} \right] \frac{1}{n_C} \mathbb{E} [s_C^2] \right. \\
&\quad \left. + Nr_1 \mathbb{E} \left[ n_{C_\ominus} - \frac{1}{Nr_1} n_{C_\ominus}^2 \right] \mathbb{E} \left[ \left( \frac{1}{n_C} \sum_{i=1}^{n_C} y_{C, i} \right)^2 \right] \right. \\
&\quad \left. - 2Nr_1 \mathbb{E} \left[ \left( 1 - \frac{n_{C_\ominus}}{Nr_1} \right) \left( \sum_{i=1}^{n_{C_\ominus}} y_{C_\ominus, i} \right) \right] \mathbb{E} \left[ \frac{1}{n_C} \sum_{i=1}^{n_C} y_{C, i} \right] \right) \\
&= \frac{1}{Nr_1 - 1} \left( \underbrace{Nr_1 \mathbb{E} \left[ \sum_{i=1}^{n_{C_\ominus}} y_{C_\ominus, i}^2 \right]}_{(12)} - \underbrace{\mathbb{E} \left[ \sum_{i=1}^{n_{C_\ominus}} y_{C_\ominus, i} \right]^2}_{(10)} - \underbrace{\text{VAR} \left[ \sum_{i=1}^{n_{C_\ominus}} y_{C_\ominus, i} \right]}_{(11)} \right. \\
&\quad \left. + Nr_1 \left( \underbrace{\mathbb{E} [n_{C_\ominus}]^2}_{(4)} + \underbrace{\text{VAR} [n_{C_\ominus}]}_{(5)} - \underbrace{\mathbb{E} [n_{C_\ominus}]}_{(4)} \right) \frac{1}{n_C} \underbrace{\mathbb{E} [s_C^2]}_{(58)} \right. \\
&\quad \left. + Nr_1 \left( \underbrace{\mathbb{E} [n_{C_\ominus}]}_{(4)} - \frac{1}{Nr_1} \left( \underbrace{\mathbb{E} [n_{C_\ominus}]^2}_{(4)} + \underbrace{\text{VAR} [n_{C_\ominus}]}_{(5)} \right) \right) \left( \underbrace{\mathbb{E} \left[ \frac{1}{n_C} \sum_{i=1}^{n_C} y_{C, i} \right]^2}_{(15)} + \underbrace{\text{VAR} \left[ \frac{1}{n_C} \sum_{i=1}^{n_C} y_{C, i} \right]}_{(16)} \right) \right. \\
&\quad \left. - 2Nr_1 \left( \underbrace{\mathbb{E} \left[ \sum_{i=1}^{n_{C_\ominus}} y_{C_\ominus, i} \right]}_{(10)} - \frac{1}{Nr_1} \underbrace{\mathbb{E} \left[ n_{C_\ominus} \sum_{i=1}^{n_{C_\ominus}} y_{C_\ominus, i} \right]}_{(22)} \right) \underbrace{\mathbb{E} \left[ \frac{1}{n_C} \sum_{i=1}^{n_C} y_{C, i} \right]}_{(15)} \right) \tag{63}
\end{aligned}$$

$$\begin{aligned}
\mathbb{E} \left[ \widehat{\text{COV}} [Z_T, Z_C] \right] &= \mathbb{E} \left[ \frac{1}{Nr_1 - 1} \left( - \left( \sum_{i=1}^{n_{T_{\oplus}}} y_{T_{\oplus},i} \right) \left( \sum_{i=1}^{n_{C_{\ominus}}} y_{C_{\ominus},i} \right) + \left( \sum_{i=1}^{n_{T_{\oplus}}} y_{T_{\oplus},i} \right) n_{C_{\ominus}} \left( \frac{1}{n_C} \sum_{i=1}^{n_C} y_{C,i} \right) \right. \right. \\
&\quad \left. \left. + \left( \sum_{i=1}^{n_{C_{\ominus}}} y_{C_{\ominus},i} \right) n_{T_{\oplus}} \left( \frac{1}{n_T} \sum_{i=1}^{n_T} y_{T,i} \right) - n_{T_{\oplus}} n_{C_{\ominus}} \left( \frac{1}{n_T} \sum_{i=1}^{n_T} y_{T,i} \right) \left( \frac{1}{n_C} \sum_{i=1}^{n_C} y_{C,i} \right) \right) \right] \\
&= \frac{1}{Nr_1 - 1} \left( - \mathbb{E} \left[ \left( \sum_{i=1}^{n_{T_{\oplus}}} y_{T_{\oplus},i} \right) \left( \sum_{i=1}^{n_{C_{\ominus}}} y_{C_{\ominus},i} \right) \right] + \mathbb{E} \left[ \left( \sum_{i=1}^{n_{T_{\oplus}}} y_{T_{\oplus},i} \right) n_{C_{\ominus}} \left( \frac{1}{n_C} \sum_{i=1}^{n_C} y_{C,i} \right) \right] \right. \\
&\quad \left. + \mathbb{E} \left[ \left( \sum_{i=1}^{n_{C_{\ominus}}} y_{C_{\ominus},i} \right) n_{T_{\oplus}} \left( \frac{1}{n_T} \sum_{i=1}^{n_T} y_{T,i} \right) \right] - \mathbb{E} \left[ n_{T_{\oplus}} n_{C_{\ominus}} \left( \frac{1}{n_T} \sum_{i=1}^{n_T} y_{T,i} \right) \left( \frac{1}{n_C} \sum_{i=1}^{n_C} y_{C,i} \right) \right] \right) \\
&= \frac{1}{Nr_1 - 1} \left( - \underbrace{\mathbb{E} \left[ \left( \sum_{i=1}^{n_{T_{\oplus}}} y_{T_{\oplus},i} \right) \left( \sum_{i=1}^{n_{C_{\ominus}}} y_{C_{\ominus},i} \right) \right]}_{(25)} + \underbrace{\mathbb{E} \left[ \left( \sum_{i=1}^{n_{T_{\oplus}}} y_{T_{\oplus},i} \right) n_{C_{\ominus}} \right]}_{(23)} \underbrace{\mathbb{E} \left[ \frac{1}{n_C} \sum_{i=1}^{n_C} y_{C,i} \right]}_{(15)} \right. \\
&\quad \left. + \underbrace{\mathbb{E} \left[ \left( \sum_{i=1}^{n_{C_{\ominus}}} y_{C_{\ominus},i} \right) n_{T_{\oplus}} \right]}_{(24)} \underbrace{\mathbb{E} \left[ \frac{1}{n_T} \sum_{i=1}^{n_T} y_{T,i} \right]}_{(13)} - \underbrace{\mathbb{E} [n_{T_{\oplus}} n_{C_{\ominus}}]}_{(6)} \underbrace{\mathbb{E} \left[ \frac{1}{n_T} \sum_{i=1}^{n_T} y_{T,i} \right]}_{(13)} \underbrace{\mathbb{E} \left[ \frac{1}{n_C} \sum_{i=1}^{n_C} y_{C,i} \right]}_{(15)} \right) \tag{64}
\end{aligned}$$

## 6 Confidence intervals

In the following, we assume that the true values for the prevalence  $p$ , the sensitivity  $t$ , and the specificity  $s$  are **known**. We want to estimate the differences  $\mu_{T_+} - \mu_{C_+}$  and  $\mu_{T_-} - \mu_{C_-}$ . Note that the values of  $\mu_{T_+}$ ,  $\mu_{C_+}$ ,  $\mu_{T_-}$ , and  $\mu_{C_-}$  cannot be observed directly within this design. Let  $\theta_{T_{\oplus}}$ ,  $\theta_{C_{\ominus}}$ ,  $\mu_T$ , and  $\mu_C$  denote the true means of the biomarker-led treatment arm, the biomarker-led control arm, the randomised treatment arm, and the randomised control arm with

$$\theta_{T_{\oplus}} = pt\mu_{T_+} + (1-p)(1-s)\mu_{T_-}, \tag{65}$$

$$\theta_{C_{\ominus}} = p(1-t)\mu_{C_+} + (1-p)s\mu_{C_-}, \tag{66}$$

$$\mu_T = p\mu_{T_+} + (1-p)\mu_{T_-}, \tag{67}$$

$$\mu_C = p\mu_{C_+} + (1-p)\mu_{C_-}. \tag{68}$$

Solving the system of equations for  $\mu_{T_+}$ ,  $\mu_{C_+}$ ,  $\mu_{T_-}$ , and  $\mu_{C_-}$  yields

$$\mu_{T_+} = \frac{\theta_{T_{\oplus}} - (1-s)\mu_T}{p(t+s-1)}, \tag{69}$$

$$\mu_{C_+} = - \frac{\theta_{C_{\ominus}} - s\mu_C}{p(t+s-1)}, \tag{70}$$

$$\mu_{T_-} = - \frac{\theta_{T_{\oplus}} - t\mu_T}{(1-p)(t+s-1)}, \tag{71}$$

$$\mu_{C_-} = \frac{\theta_{C_{\ominus}} - (1-t)\mu_C}{(1-p)(t+s-1)}. \tag{72}$$



Hence, we can define point estimators as

$$\hat{\mu}_{T_+} - \hat{\mu}_{C_+} = \frac{\hat{\theta}_{T_\oplus} + \hat{\theta}_{C_\ominus} - (1-s)\hat{\mu}_T - s\hat{\mu}_C}{p(t+s-1)}, \quad (73)$$

$$\hat{\mu}_{T_-} - \hat{\mu}_{C_-} = -\frac{\hat{\theta}_{T_\oplus} + \hat{\theta}_{C_\ominus} - t\hat{\mu}_T - (1-t)\hat{\mu}_C}{(1-p)(t+s-1)} \quad (74)$$

with

$$\hat{\theta}_{T_\oplus} = \frac{1}{Nr_1} \sum_{i=1}^{n_{T_\oplus}} y_{T_\oplus, i}, \quad (75)$$

$$\hat{\theta}_{C_\ominus} = \frac{1}{Nr_1} \sum_{i=1}^{n_{C_\ominus}} y_{C_\ominus, i}, \quad (76)$$

$$\hat{\mu}_T = \frac{1}{n_T} \sum_{i=1}^{n_T} y_{T, i}, \quad (77)$$

$$\hat{\mu}_C = \frac{1}{n_C} \sum_{i=1}^{n_C} y_{C, i}. \quad (78)$$

The true variances and covariance of the estimators are given by

$$\begin{aligned} \text{VAR} [\hat{\mu}_{T_+} - \hat{\mu}_{C_+}] &= \text{VAR} \left[ \frac{\hat{\theta}_{T_\oplus} + \hat{\theta}_{C_\ominus} - (1-s)\hat{\mu}_T - s\hat{\mu}_C}{p(t+s-1)} \right] \\ &= \frac{1}{(p(t+s-1))^2} \left( \text{VAR} [\hat{\theta}_{T_\oplus}] + \text{VAR} [\hat{\theta}_{C_\ominus}] - (1-s)^2 \text{VAR} [\hat{\mu}_T] - s^2 \text{VAR} [\hat{\mu}_C] \right. \\ &\quad \left. + 2 \text{COV} [\hat{\theta}_{T_\oplus}, \hat{\theta}_{C_\ominus}] - 2(1-s) \underbrace{\text{COV} [\hat{\theta}_{T_\oplus}, \hat{\mu}_T]}_{=0} - 2s \underbrace{\text{COV} [\hat{\theta}_{T_\oplus}, \hat{\mu}_C]}_{=0} \right. \\ &\quad \left. - 2(1-s) \underbrace{\text{COV} [\hat{\theta}_{C_\ominus}, \hat{\mu}_T]}_{=0} + 2s \underbrace{\text{COV} [\hat{\theta}_{C_\ominus}, \hat{\mu}_C]}_{=0} - 2s(1-s) \underbrace{\text{COV} [\hat{\mu}_T, \hat{\mu}_C]}_{=0} \right) \\ &= \frac{1}{(p(t+s-1))^2} \left( \underbrace{\frac{1}{(Nr_1)^2} \text{VAR} \left[ \sum_{i=1}^{n_{T_\oplus}} y_{T_\oplus, i} \right]}_{(8)} + \underbrace{\frac{1}{(Nr_1)^2} \text{VAR} \left[ \sum_{i=1}^{n_{C_\ominus}} y_{C_\ominus, i} \right]}_{(11)} \right. \\ &\quad \left. - (1-s)^2 \underbrace{\text{VAR} \left[ \frac{1}{n_T} \sum_{i=1}^{n_T} y_{T, i} \right]}_{(14)} - s^2 \underbrace{\text{VAR} \left[ \frac{1}{n_C} \sum_{i=1}^{n_C} y_{C, i} \right]}_{(16)} + \frac{2}{(Nr_1)^2} \underbrace{\text{COV} \left[ \sum_{i=1}^{n_{T_\oplus}} y_{T_\oplus, i}, \sum_{i=1}^{n_{C_\ominus}} y_{C_\ominus, i} \right]}_{(28)} \right) \\ &= \frac{1}{(p(t+s-1))^2} \left( \frac{\sigma_{T_\oplus}^2}{Nr_1} + \frac{\sigma_{C_\ominus}^2}{Nr_1} + \frac{(1-s)^2 \sigma_T^2}{n_T} + \frac{s^2 \sigma_C^2}{n_C} - \frac{2\theta_{T_\oplus} \theta_{C_\ominus}}{Nr_1} \right) \quad (79) \end{aligned}$$

$$\begin{aligned}
\text{VAR} [\hat{\mu}_{T_-} - \hat{\mu}_{C_-}] &= \text{VAR} \left[ -\frac{\hat{\theta}_{T_\oplus} + \hat{\theta}_{C_\ominus} - t\hat{\mu}_T - (1-t)\hat{\mu}_C}{(1-p)(t+s-1)} \right] = (-1)^2 \text{VAR} \left[ \frac{\hat{\theta}_{T_\oplus} + \hat{\theta}_{C_\ominus} - t\hat{\mu}_T - (1-t)\hat{\mu}_C}{(1-p)(t+s-1)} \right] \\
&= \frac{1}{((1-p)(t+s-1))^2} \left( \text{VAR} [\hat{\theta}_{T_\oplus}] + \text{VAR} [\hat{\theta}_{C_\ominus}] - t^2 \text{VAR} [\hat{\mu}_T] - (1-t)^2 \text{VAR} [\hat{\mu}_C] \right. \\
&\quad + 2 \text{COV} [\hat{\theta}_{T_\oplus}, \hat{\theta}_{C_\ominus}] - \underbrace{2t \text{COV} [\hat{\theta}_{T_\oplus}, \hat{\mu}_T]}_{=0} - 2(1-t) \underbrace{\text{COV} [\hat{\theta}_{T_\oplus}, \hat{\mu}_C]}_{=0} - \underbrace{2t \text{COV} [\hat{\theta}_{C_\ominus}, \hat{\mu}_T]}_{=0} \\
&\quad \left. + 2(1-t) \underbrace{\text{COV} [\hat{\theta}_{C_\ominus}, \hat{\mu}_C]}_{=0} - 2t(1-t) \underbrace{\text{COV} [\hat{\mu}_T, \hat{\mu}_C]}_{=0} \right) \\
&= \frac{1}{((1-p)(t+s-1))^2} \left( \frac{1}{(Nr_1)^2} \underbrace{\text{VAR} \left[ \sum_{i=1}^{n_{T_\oplus}} y_{T_\oplus, i} \right]}_{(8)} + \frac{1}{(Nr_1)^2} \underbrace{\text{VAR} \left[ \sum_{i=1}^{n_{C_\ominus}} y_{C_\ominus, i} \right]}_{(11)} \right. \\
&\quad \left. - t^2 \underbrace{\text{VAR} \left[ \frac{1}{n_T} \sum_{i=1}^{n_T} y_{T, i} \right]}_{(14)} - (1-t)^2 \underbrace{\text{VAR} \left[ \frac{1}{n_C} \sum_{i=1}^{n_C} y_{C, i} \right]}_{(16)} + \frac{2}{(Nr_1)^2} \underbrace{\text{COV} \left[ \sum_{i=1}^{n_{T_\oplus}} y_{T_\oplus, i}, \sum_{i=1}^{n_{C_\ominus}} y_{C_\ominus, i} \right]}_{(28)} \right) \\
&= \frac{1}{((1-p)(t+s-1))^2} \left( \frac{\sigma_{T_\oplus}^2}{Nr_1} + \frac{\sigma_{C_\ominus}^2}{Nr_1} + \frac{t^2 \sigma_T^2}{n_T} + \frac{(1-t)^2 \sigma_C^2}{n_C} - \frac{2\theta_{T_\oplus} \theta_{C_\ominus}}{Nr_1} \right) \quad (80)
\end{aligned}$$

$$\begin{aligned}
\text{COV} [\hat{\mu}_{T_+} - \hat{\mu}_{C_+}, \hat{\mu}_{T_-} - \hat{\mu}_{C_-}] &= -\frac{1}{p(1-p)(t+s-1)^2} \left( \text{V} [\hat{\theta}_{T_\oplus}] + \text{V} [\hat{\theta}_{C_\ominus}] + t(1-s)\text{V} [\hat{\mu}_T] + (1-t)s\text{V} [\hat{\mu}_C] \right. \\
&\quad + \text{COV} [\hat{\theta}_{T_\oplus}, \hat{\theta}_{C_\ominus}] - (t+1-s) \underbrace{\text{COV} [\hat{\theta}_{T_\oplus}, \hat{\mu}_T]}_{=0} - (1-t+s) \underbrace{\text{COV} [\hat{\theta}_{T_\oplus}, \hat{\mu}_C]}_{=0} \\
&\quad - (t+1-s) \underbrace{\text{COV} [\hat{\theta}_{C_\ominus}, \hat{\mu}_T]}_{=0} - (1-t+s) \underbrace{\text{COV} [\hat{\theta}_{C_\ominus}, \hat{\mu}_C]}_{=0} \\
&\quad \left. + ((1-t)(1-s) + ts) \underbrace{\text{COV} [\hat{\mu}_T, \hat{\mu}_C]}_{=0} \right) \\
&= -\frac{1}{p(1-p)(t+s-1)^2} \left( \frac{\sigma_{T_\oplus}^2}{Nr_1} + \frac{\sigma_{C_\ominus}^2}{Nr_1} + \frac{t(1-s)\sigma_T^2}{n_T} + \frac{(1-t)s\sigma_C^2}{n_C} - \frac{2\theta_{T_\oplus} \theta_{C_\ominus}}{Nr_1} \right) \quad (81)
\end{aligned}$$

These variances and the covariance can be estimated as follows:

$$\begin{aligned} \widehat{\text{VAR}} [\hat{\mu}_{T_+} - \hat{\mu}_{C_+}] &= \frac{1}{(p(t+s-1))^2} \left( \frac{Nr_1 \sum_{i=1}^{n_{T_+}} y_{T_+,i}^2 - \left( \sum_{i=1}^{n_{T_+}} y_{T_+,i} \right)^2}{(Nr_1)^2(Nr_1-1)} \right. \\ &\quad + \frac{Nr_1 \sum_{i=1}^{n_{C_+}} y_{C_+,i}^2 - \left( \sum_{i=1}^{n_{C_+}} y_{C_+,i} \right)^2}{(Nr_1)^2(Nr_1-1)} + \frac{(1-s)^2 s_T^2}{n_T} + \frac{s^2 s_C^2}{n_C} \\ &\quad \left. - \frac{2}{(Nr_1)^2(Nr_1-1)} \left( \sum_{i=1}^{n_{T_+}} y_{T_+,i} \right) \left( \sum_{i=1}^{n_{C_+}} y_{C_+,i} \right) \right) \end{aligned} \quad (82)$$

$$\begin{aligned} \widehat{\text{VAR}} [\hat{\mu}_{T_-} - \hat{\mu}_{C_-}] &= \frac{1}{((1-p)(t+s-1))^2} \left( \frac{Nr_1 \sum_{i=1}^{n_{T_-}} y_{T_-,i}^2 - \left( \sum_{i=1}^{n_{T_-}} y_{T_-,i} \right)^2}{(Nr_1)^2(Nr_1-1)} \right. \\ &\quad + \frac{Nr_1 \sum_{i=1}^{n_{C_-}} y_{C_-,i}^2 - \left( \sum_{i=1}^{n_{C_-}} y_{C_-,i} \right)^2}{(Nr_1)^2(Nr_1-1)} + \frac{t^2 s_T^2}{n_T} + \frac{(1-t)^2 s_C^2}{n_C} \\ &\quad \left. - \frac{2}{(Nr_1)^2(Nr_1-1)} \left( \sum_{i=1}^{n_{T_-}} y_{T_-,i} \right) \left( \sum_{i=1}^{n_{C_-}} y_{C_-,i} \right) \right) \end{aligned} \quad (83)$$

$$\begin{aligned} \widehat{\text{COV}} [\hat{\mu}_{T_+} - \hat{\mu}_{C_+}, \hat{\mu}_{T_-} - \hat{\mu}_{C_-}] &= \frac{1}{p(1-p)(t+s-1)^2} \left( \frac{Nr_1 \sum_{i=1}^{n_{T_+}} y_{T_+,i}^2 - \left( \sum_{i=1}^{n_{T_+}} y_{T_+,i} \right)^2}{(Nr_1)^2(Nr_1-1)} \right. \\ &\quad + \frac{Nr_1 \sum_{i=1}^{n_{C_+}} y_{C_+,i}^2 - \left( \sum_{i=1}^{n_{C_+}} y_{C_+,i} \right)^2}{(Nr_1)^2(Nr_1-1)} + \frac{t(1-s)s_T^2}{n_T} + \frac{(1-t)ss_C^2}{n_C} \\ &\quad \left. - \frac{2}{(Nr_1)^2(Nr_1-1)} \left( \sum_{i=1}^{n_{T_+}} y_{T_+,i} \right) \left( \sum_{i=1}^{n_{C_+}} y_{C_+,i} \right) \right) \end{aligned} \quad (84)$$

For the definition of  $s_T^2$  and  $s_C^2$  see Equations (55) and (56). In the following, we show that the above estimators are unbiased estimators for the respective quantities.

$$\begin{aligned}
\mathbb{E} \left[ \widehat{\text{VAR}} [\hat{\mu}_{T_+} - \hat{\mu}_{C_+}] \right] &= \mathbb{E} \left[ \frac{1}{(p(t+s-1))^2} \left( \frac{Nr_1 \sum_{i=1}^{n_{T_\oplus}} y_{T_\oplus,i}^2 - \left( \sum_{i=1}^{n_{T_\oplus}} y_{T_\oplus,i} \right)^2}{(Nr_1)^2(Nr_1-1)} \right. \right. \\
&+ \frac{Nr_1 \sum_{i=1}^{n_{C_\ominus}} y_{C_\ominus,i}^2 - \left( \sum_{i=1}^{n_{C_\ominus}} y_{C_\ominus,i} \right)^2}{(Nr_1)^2(Nr_1-1)} + \frac{(1-s)^2 s_T^2}{n_T} + \frac{s^2 s_C^2}{n_C} \\
&\left. \left. - \frac{2}{(Nr_1)^2(Nr_1-1)} \left( \sum_{i=1}^{n_{T_\oplus}} y_{T_\oplus,i} \right) \left( \sum_{i=1}^{n_{C_\ominus}} y_{C_\ominus,i} \right) \right) \right] \\
&= \frac{1}{(p(t+s-1))^2} \left( \frac{1}{(Nr_1)^2(Nr_1-1)} \left( \overbrace{Nr_1 \mathbb{E} \left[ \sum_{i=1}^{n_{T_\oplus}} y_{T_\oplus,i}^2 \right]}^{(9)} - \overbrace{\mathbb{E} \left[ \sum_{i=1}^{n_{T_\oplus}} y_{T_\oplus,i} \right]^2}^{(7)} - \overbrace{\text{VAR} \left[ \sum_{i=1}^{n_{T_\oplus}} y_{T_\oplus,i} \right]}^{(8)} \right) \right. \\
&+ \frac{1}{(Nr_1)^2(Nr_1-1)} \left( \overbrace{Nr_1 \mathbb{E} \left[ \sum_{i=1}^{n_{C_\ominus}} y_{C_\ominus,i}^2 \right]}^{(12)} - \overbrace{\mathbb{E} \left[ \sum_{i=1}^{n_{C_\ominus}} y_{C_\ominus,i} \right]^2}^{(10)} - \overbrace{\text{VAR} \left[ \sum_{i=1}^{n_{C_\ominus}} y_{C_\ominus,i} \right]}^{(11)} \right) \\
&\left. + \frac{(1-s)^2 \overbrace{\mathbb{E} [s_T^2]}^{(57)}}{n_T} + \frac{s^2 \overbrace{\mathbb{E} [s_C^2]}^{(58)}}{n_C} - \frac{2}{(Nr_1)^2(Nr_1-1)} \overbrace{\mathbb{E} \left[ \left( \sum_{i=1}^{n_{T_\oplus}} y_{T_\oplus,i} \right) \left( \sum_{i=1}^{n_{C_\ominus}} y_{C_\ominus,i} \right) \right]}^{(25)} \right) \tag{85}
\end{aligned}$$

$$\begin{aligned}
\mathbb{E} \left[ \widehat{\text{VAR}} [\hat{\mu}_{T_-} - \hat{\mu}_{C_-}] \right] &= \mathbb{E} \left[ \frac{1}{((1-p)(t+s-1))^2} \left( \frac{Nr_1 \sum_{i=1}^{n_{T_\oplus}} y_{T_\oplus,i}^2 - \left( \sum_{i=1}^{n_{T_\oplus}} y_{T_\oplus,i} \right)^2}{(Nr_1)^2(Nr_1-1)} \right. \right. \\
&+ \frac{Nr_1 \sum_{i=1}^{n_{C_\ominus}} y_{C_\ominus,i}^2 - \left( \sum_{i=1}^{n_{C_\ominus}} y_{C_\ominus,i} \right)^2}{(Nr_1)^2(Nr_1-1)} + \frac{t^2 s_T^2}{n_T} + \frac{(1-t)^2 s_C^2}{n_C} \\
&\left. \left. - \frac{2}{(Nr_1)^2(Nr_1-1)} \left( \sum_{i=1}^{n_{T_\oplus}} y_{T_\oplus,i} \right) \left( \sum_{i=1}^{n_{C_\ominus}} y_{C_\ominus,i} \right) \right) \right] \\
&= \frac{1}{((1-p)(t+s-1))^2} \left( \frac{1}{(Nr_1)^2(Nr_1-1)} \left( \overbrace{Nr_1 \mathbb{E} \left[ \sum_{i=1}^{n_{T_\oplus}} y_{T_\oplus,i}^2 \right]}^{(9)} - \overbrace{\mathbb{E} \left[ \sum_{i=1}^{n_{T_\oplus}} y_{T_\oplus,i} \right]^2}^{(7)} \right. \right. \\
&\left. \left. - \overbrace{\text{VAR} \left[ \sum_{i=1}^{n_{T_\oplus}} y_{T_\oplus,i} \right]}^{(8)} \right) + \frac{1}{(Nr_1)^2(Nr_1-1)} \left( \overbrace{Nr_1 \mathbb{E} \left[ \sum_{i=1}^{n_{C_\ominus}} y_{C_\ominus,i}^2 \right]}^{(12)} - \overbrace{\mathbb{E} \left[ \sum_{i=1}^{n_{C_\ominus}} y_{C_\ominus,i} \right]^2}^{(10)} \right. \right. \\
&\left. \left. - \overbrace{\text{VAR} \left[ \sum_{i=1}^{n_{C_\ominus}} y_{C_\ominus,i} \right]}^{(11)} \right) + \frac{t^2 \overbrace{\mathbb{E} [s_T^2]}^{(57)}}{n_T} + \frac{(1-t)^2 \overbrace{\mathbb{E} [s_C^2]}^{(58)}}{n_C} \right. \\
&\left. \left. - \frac{2}{(Nr_1)^2(Nr_1-1)} \overbrace{\mathbb{E} \left[ \left( \sum_{i=1}^{n_{T_\oplus}} y_{T_\oplus,i} \right) \left( \sum_{i=1}^{n_{C_\ominus}} y_{C_\ominus,i} \right) \right]}^{(25)} \right) \tag{86}
\end{aligned}$$

$$\begin{aligned}
\mathbb{E} \left[ \widehat{\text{COV}} [\hat{\mu}_{T_+} - \hat{\mu}_{C_+}, \hat{\mu}_{T_-} - \hat{\mu}_{C_-}] \right] &= \mathbb{E} \left[ \frac{1}{p(1-p)(t+s-1)^2} \left( \frac{Nr_1 \sum_{i=1}^{n_{T_\oplus}} y_{T_\oplus,i}^2 - \left( \sum_{i=1}^{n_{T_\oplus}} y_{T_\oplus,i} \right)^2}{(Nr_1)^2(Nr_1-1)} \right. \right. \\
&+ \frac{Nr_1 \sum_{i=1}^{n_{C_\ominus}} y_{C_\ominus,i}^2 - \left( \sum_{i=1}^{n_{C_\ominus}} y_{C_\ominus,i} \right)^2}{(Nr_1)^2(Nr_1-1)} + \frac{t(1-s)s_T^2}{n_T} + \frac{(1-t)ss_C^2}{n_C} \\
&\left. \left. - \frac{2}{(Nr_1)^2(Nr_1-1)} \left( \sum_{i=1}^{n_{T_\oplus}} y_{T_\oplus,i} \right) \left( \sum_{i=1}^{n_{C_\ominus}} y_{C_\ominus,i} \right) \right) \right] \\
&= \frac{1}{p(1-p)(t+s-1)^2} \left( \frac{1}{(Nr_1)^2(Nr_1-1)} \left( \overbrace{Nr_1 \mathbb{E} \left[ \sum_{i=1}^{n_{T_\oplus}} y_{T_\oplus,i}^2 \right]}^{(9)} - \overbrace{\mathbb{E} \left[ \sum_{i=1}^{n_{T_\oplus}} y_{T_\oplus,i} \right]^2}^{(7)} \right. \right. \\
&\left. \left. - \overbrace{\text{VAR} \left[ \sum_{i=1}^{n_{T_\oplus}} y_{T_\oplus,i} \right]}^{(8)} \right) + \frac{1}{(Nr_1)^2(Nr_1-1)} \left( \overbrace{Nr_1 \mathbb{E} \left[ \sum_{i=1}^{n_{C_\ominus}} y_{C_\ominus,i}^2 \right]}^{(12)} - \overbrace{\mathbb{E} \left[ \sum_{i=1}^{n_{C_\ominus}} y_{C_\ominus,i} \right]^2}^{(10)} \right. \right. \\
&\left. \left. - \overbrace{\text{VAR} \left[ \sum_{i=1}^{n_{C_\ominus}} y_{C_\ominus,i} \right]}^{(11)} \right) + \frac{t(1-s) \overbrace{\mathbb{E} [s_T^2]}^{(57)}}{n_T} + \frac{(1-t)s \overbrace{\mathbb{E} [s_C^2]}^{(58)}}{n_C} \right. \\
&\left. \left. - \frac{2}{(Nr_1)^2(Nr_1-1)} \overbrace{\mathbb{E} \left[ \left( \sum_{i=1}^{n_{T_\oplus}} y_{T_\oplus,i} \right) \left( \sum_{i=1}^{n_{C_\ominus}} y_{C_\ominus,i} \right) \right]}^{(25)} \right) \right) \tag{87}
\end{aligned}$$
